# Supplementary material
Source: Research Square preprint supplement (doi:10.21203/rs.3.rs-8814062/v1)
Supplement: Supplementary file 1 [file 0637f8617e159fdbb712227e.docx]

Supplementary Materials for

**Atomic solvent for tailorable high-entropy ceramics synthesis**

Zheng Luo1, Lunshi Zhou2, Junwei Chen3, Dongsheng He4, Xiaoping Zhou1,3[[1]](#footnote-1)*

1School of Civil Engineering, Chongqing University, Chongqing 400045, China;

2School of Civil and Environmental Engineering, Stanford University, Stanford, CA 94305, USA;

3School of Civil Engineering, Wuhan University, Wuhan 430072, China;

4Core Research Facilities, Southern University of Science and Technology, Shenzhen 518055, China

*Corresponding author. Email: [zhouxiaoping@cqu.edu.cn](mailto:zhouxiaoping@cqu.edu.cn)

**This PDF file includes:**

Supplementary Text

Supplementary Figs. 1–15

Supplementary Tables 1–7

**Other Supplementary Materials for this manuscript include the following:**

Supplementary Video 1

**Supplementary Text**

Preparation of rock-salt HECs

Rock-salt HECs were synthesized via a modified solvothermal self-assembly method followed by calcination. First, a precursor solution was prepared by dissolving stoichiometric amounts of metal salts (Hf, Ta, Nb, Mo, and LM in a molar ratio of 0.2 : 0.2 : 0.2 : 0.2 : 0.2) in a 20 mL mixed solvent of ethylene glycol and isopropanol (volume ratio 12 : 1). Separately, an glucose solution was prepared in 30 mL of the same mixed solvent, with a molar ratio of carbon ion to total metal ions set at 1 : 1. A third solution containing the reducing agent, sodium borohydride, was prepared in 40 mL of the same mixed solvent with a borohydride to total metal molar ratio of 2 : 1. These three solutions were then combined and magnetically stirred (IKA myPlate, Aika Instrument Equipment Co., Ltd, Germany) at 200 rpm for 30 minutes under a nitrogen atmosphere, with nitrogen bubbling employed for the first 15 minutes to remove dissolved oxygen. The mixed solution was transferred to a three-neck round-bottom flask and subjected to a solvothermal self-assembly reaction in an oil bath (DF-101S, Shanghai Lichen Instrument Technology Co., Ltd, China) at 60℃ for 5 hours under continuous nitrogen flow. After the reaction, the precipitate was collected by centrifugation (Avanti J-HC, Beckman Coulter International Trading Co., Ltd, USA), washed repeatedly three times with ultrapure water and anhydrous ethanol to remove residual organics and free ions, and then dried in an oven at 60℃ for 12 hours. Finally, the dried powder was calcined (LD-3-12C, Shandong Leiente Intelligent Technology Co., Ltd, China) at 300℃ for 6 hours with a heating rate of 2℃ min–1.

Preparation of pyrite HECs

Pyrite HECs were synthesized via a modified solvothermal self-assembly method followed by calcination. First, a precursor solution was prepared by dissolving stoichiometric amounts of metal salts (Fe, Co, Ni, Cr, and LMs in a molar ratio of 0.2 : 0.2 : 0.2 : 0.2 : 0.2) in a 20 mL mixed solvent of ethylene glycol and isopropanol (volume ratio 12 : 1). Separately, an thioacetamide solution was prepared in 30 mL of the same mixed solvent, with a molar ratio of sulfur ion to total metal ions set at 2 : 1. A third solution containing the reducing agent, sodium borohydride, was prepared in 40 mL of the same mixed solvent with a borohydride to total metal molar ratio of 2 : 1. These three solutions were then combined and magnetically stirred (IKA myPlate, Aika Instrument Equipment Co., Ltd, Germany) at 200 rpm for 30 minutes under a nitrogen atmosphere, with nitrogen bubbling employed for the first 15 minutes to remove dissolved oxygen. The mixed solution was transferred to a three-neck round-bottom flask and subjected to a solvothermal self-assembly reaction in an oil bath (DF-101S, Shanghai Lichen Instrument Technology Co., Ltd, China) at 60℃ for 5 hours under continuous nitrogen flow. After the reaction, the precipitate was collected by centrifugation (Avanti J-HC, Beckman Coulter International Trading Co., Ltd, USA), washed repeatedly three times with ultrapure water and anhydrous ethanol to remove residual organics and free ions, and then dried in an oven at 60℃ for 12 hours. Finally, the dried powder was calcined (LD-3-12C, Shandong Leiente Intelligent Technology Co., Ltd, China) at 300℃ for 6 hours with a heating rate of 2℃ min–1.

**
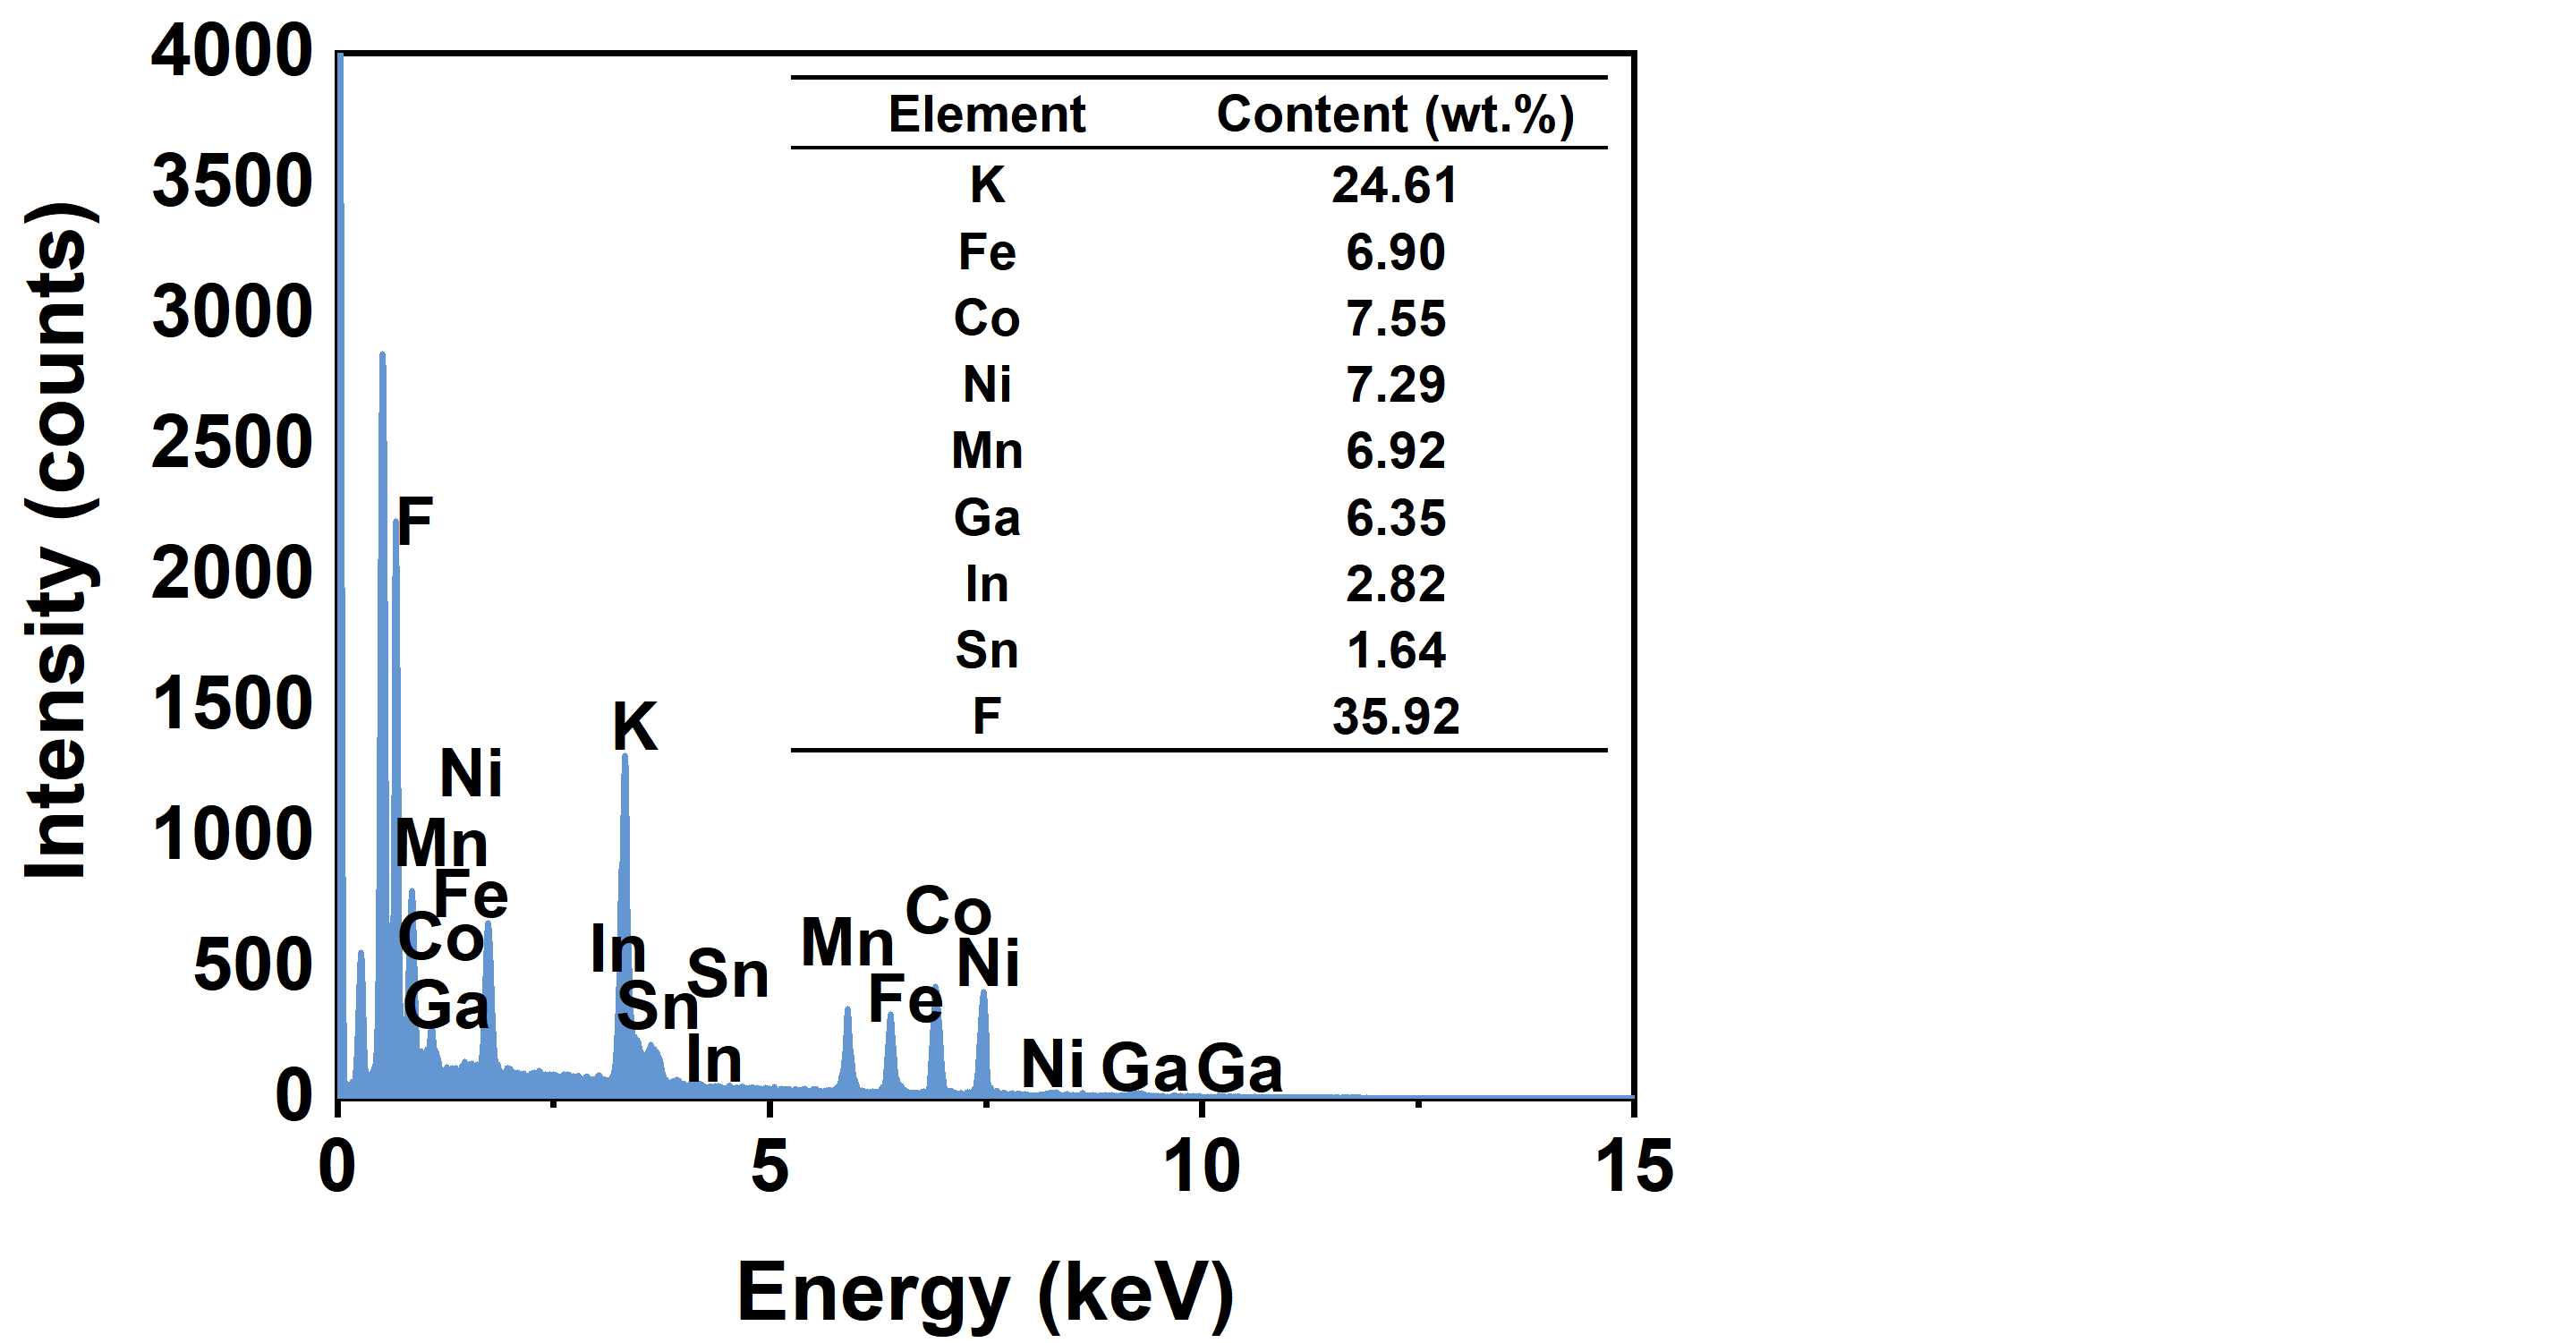
**

Supplementary Fig. 1 | EDS spectra of perovskite HECs.

**
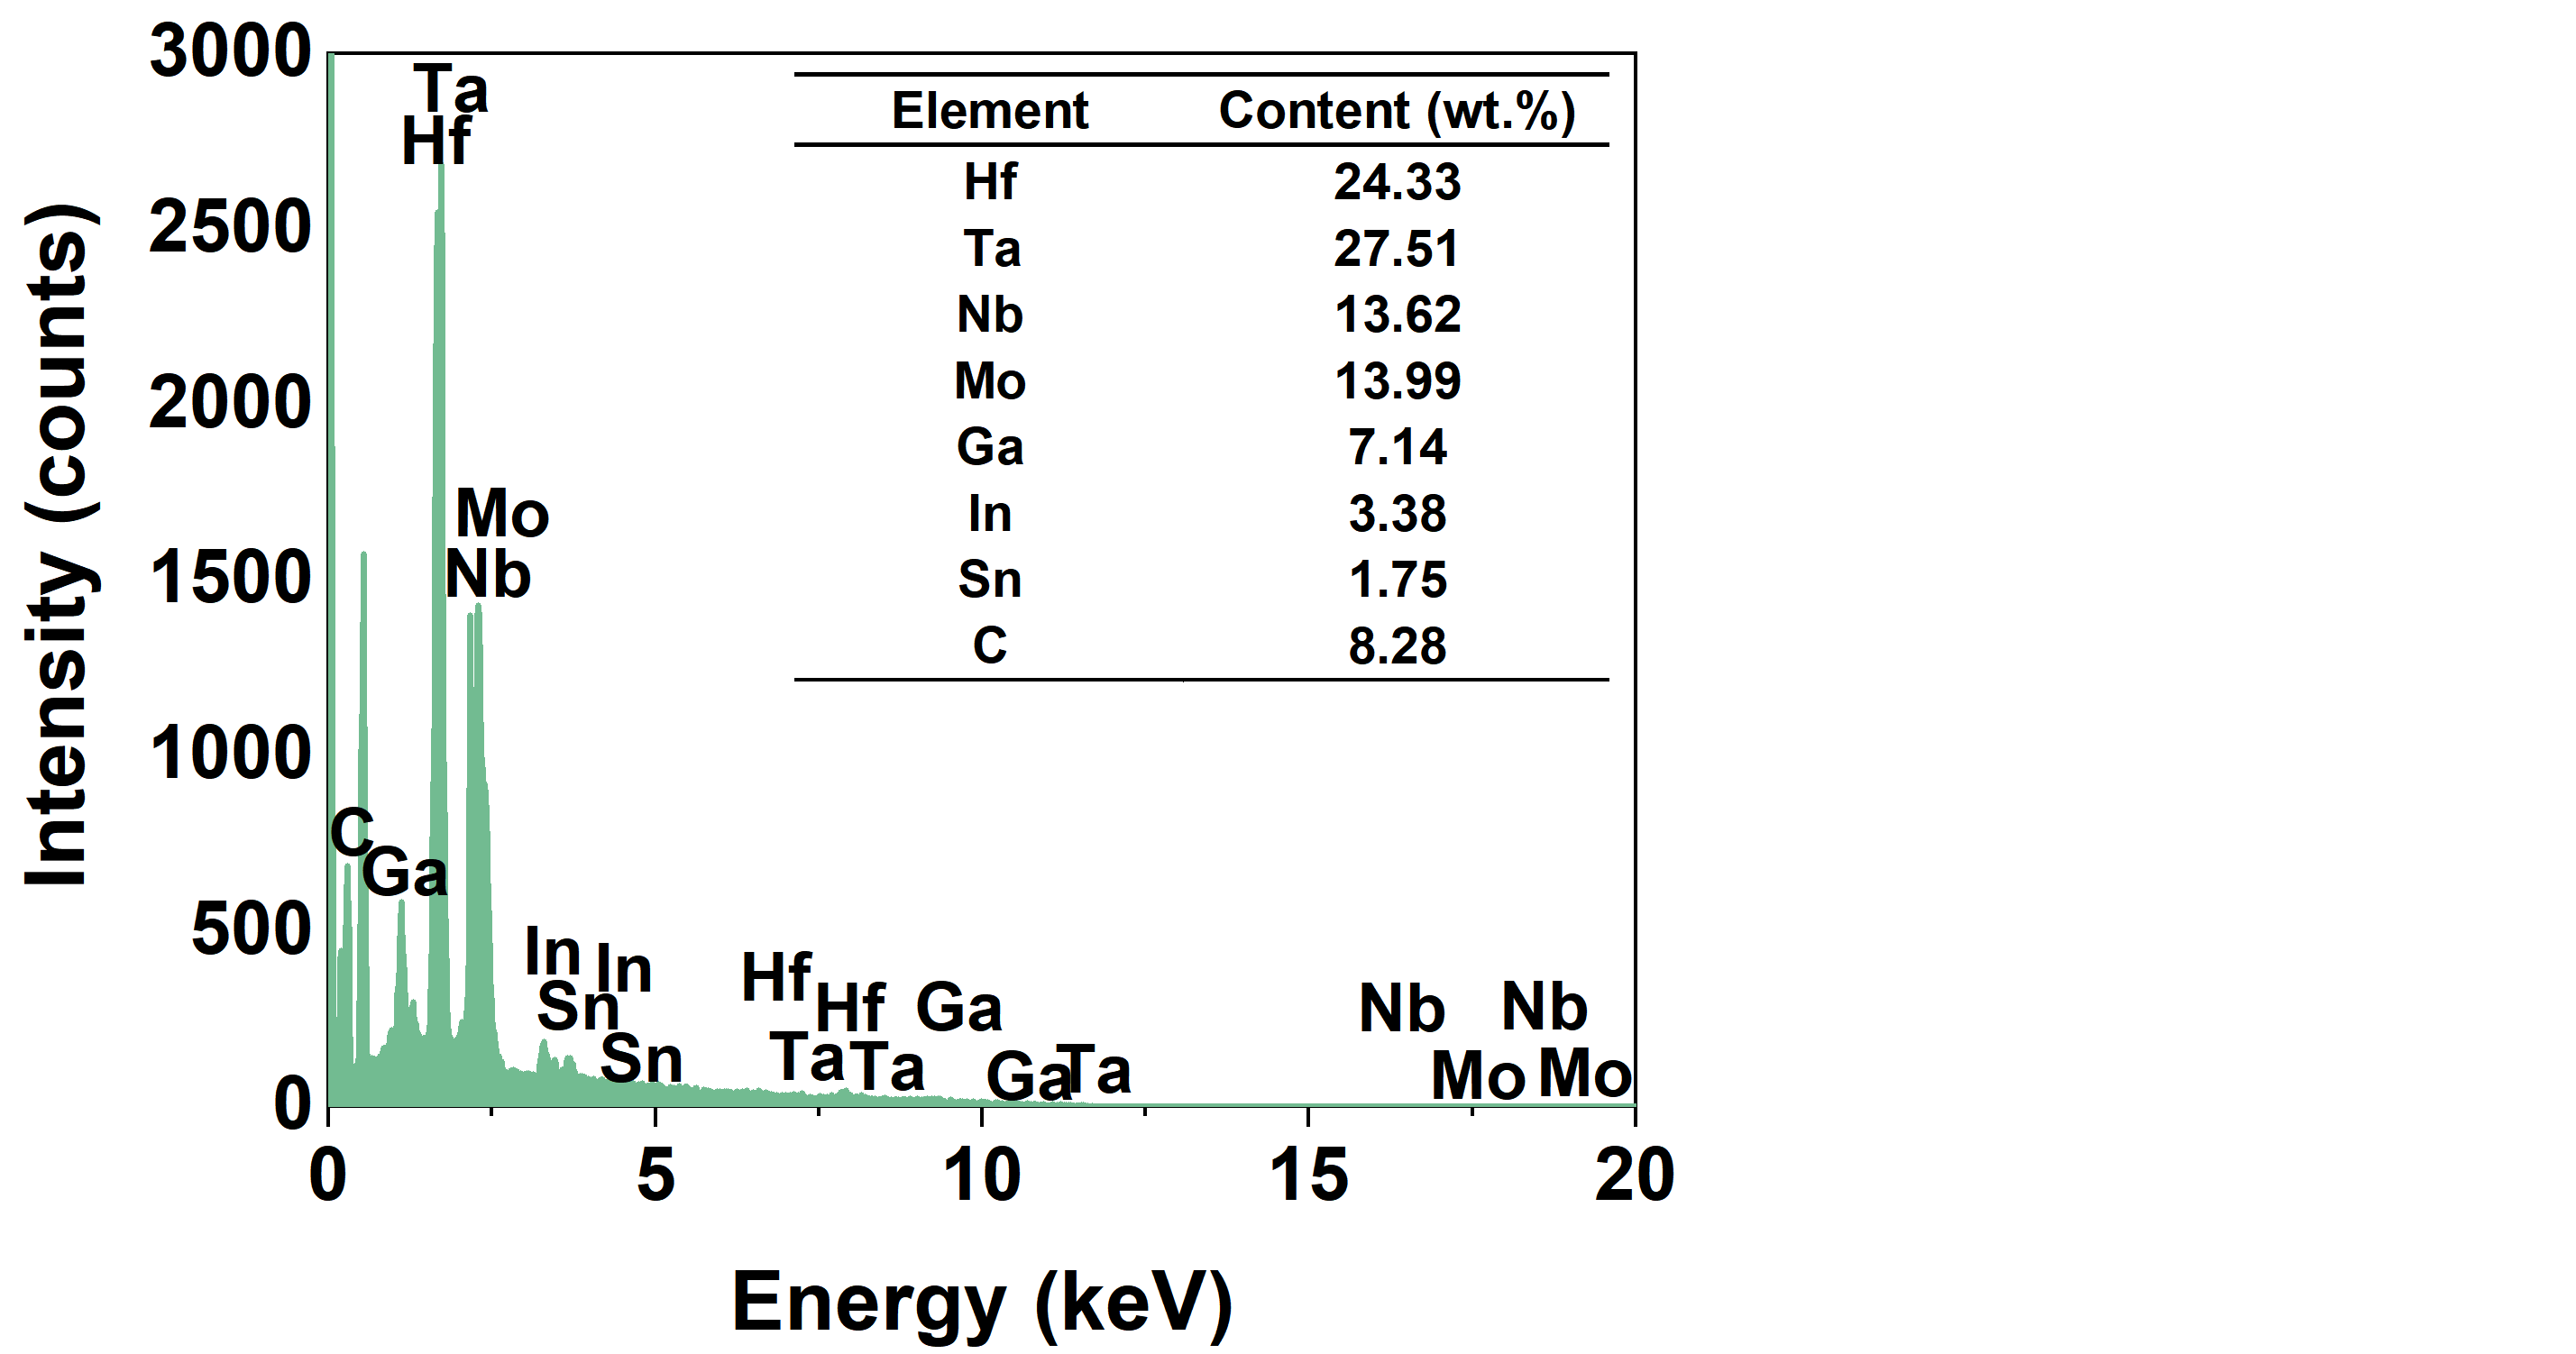
**

Supplementary Fig. 2 | EDS spectra of rock-salt HECs.

**
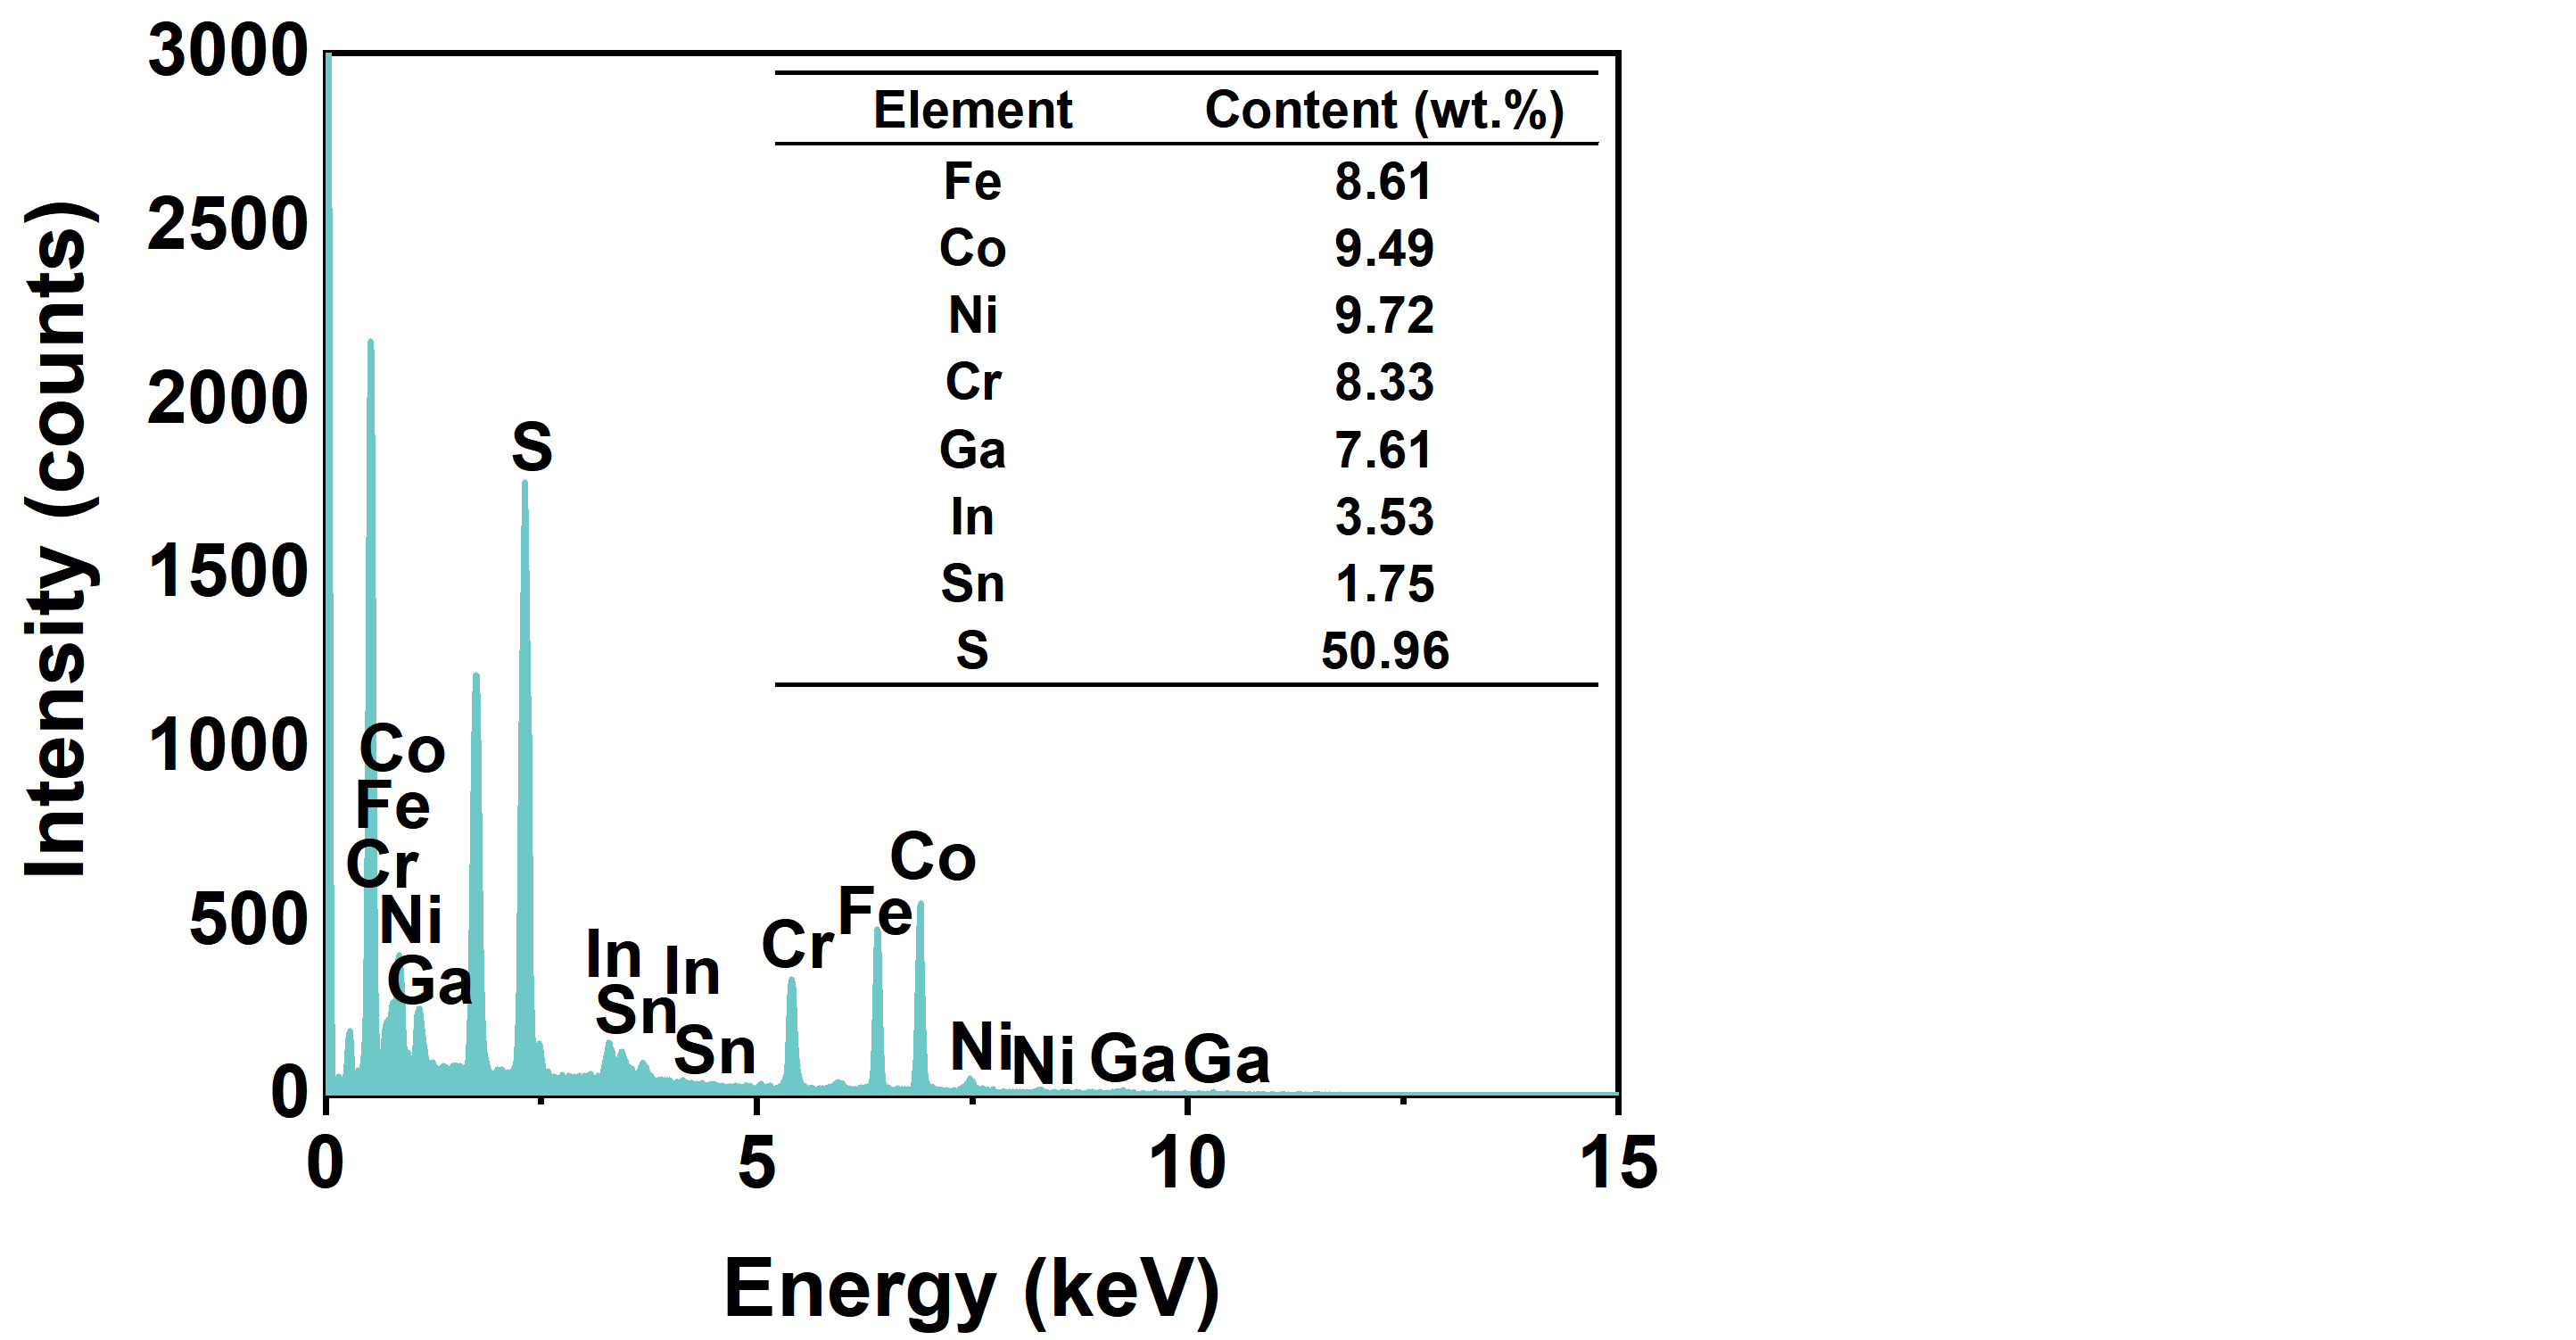
**

Supplementary Fig. 3 | EDS spectra of pyrite HECs.


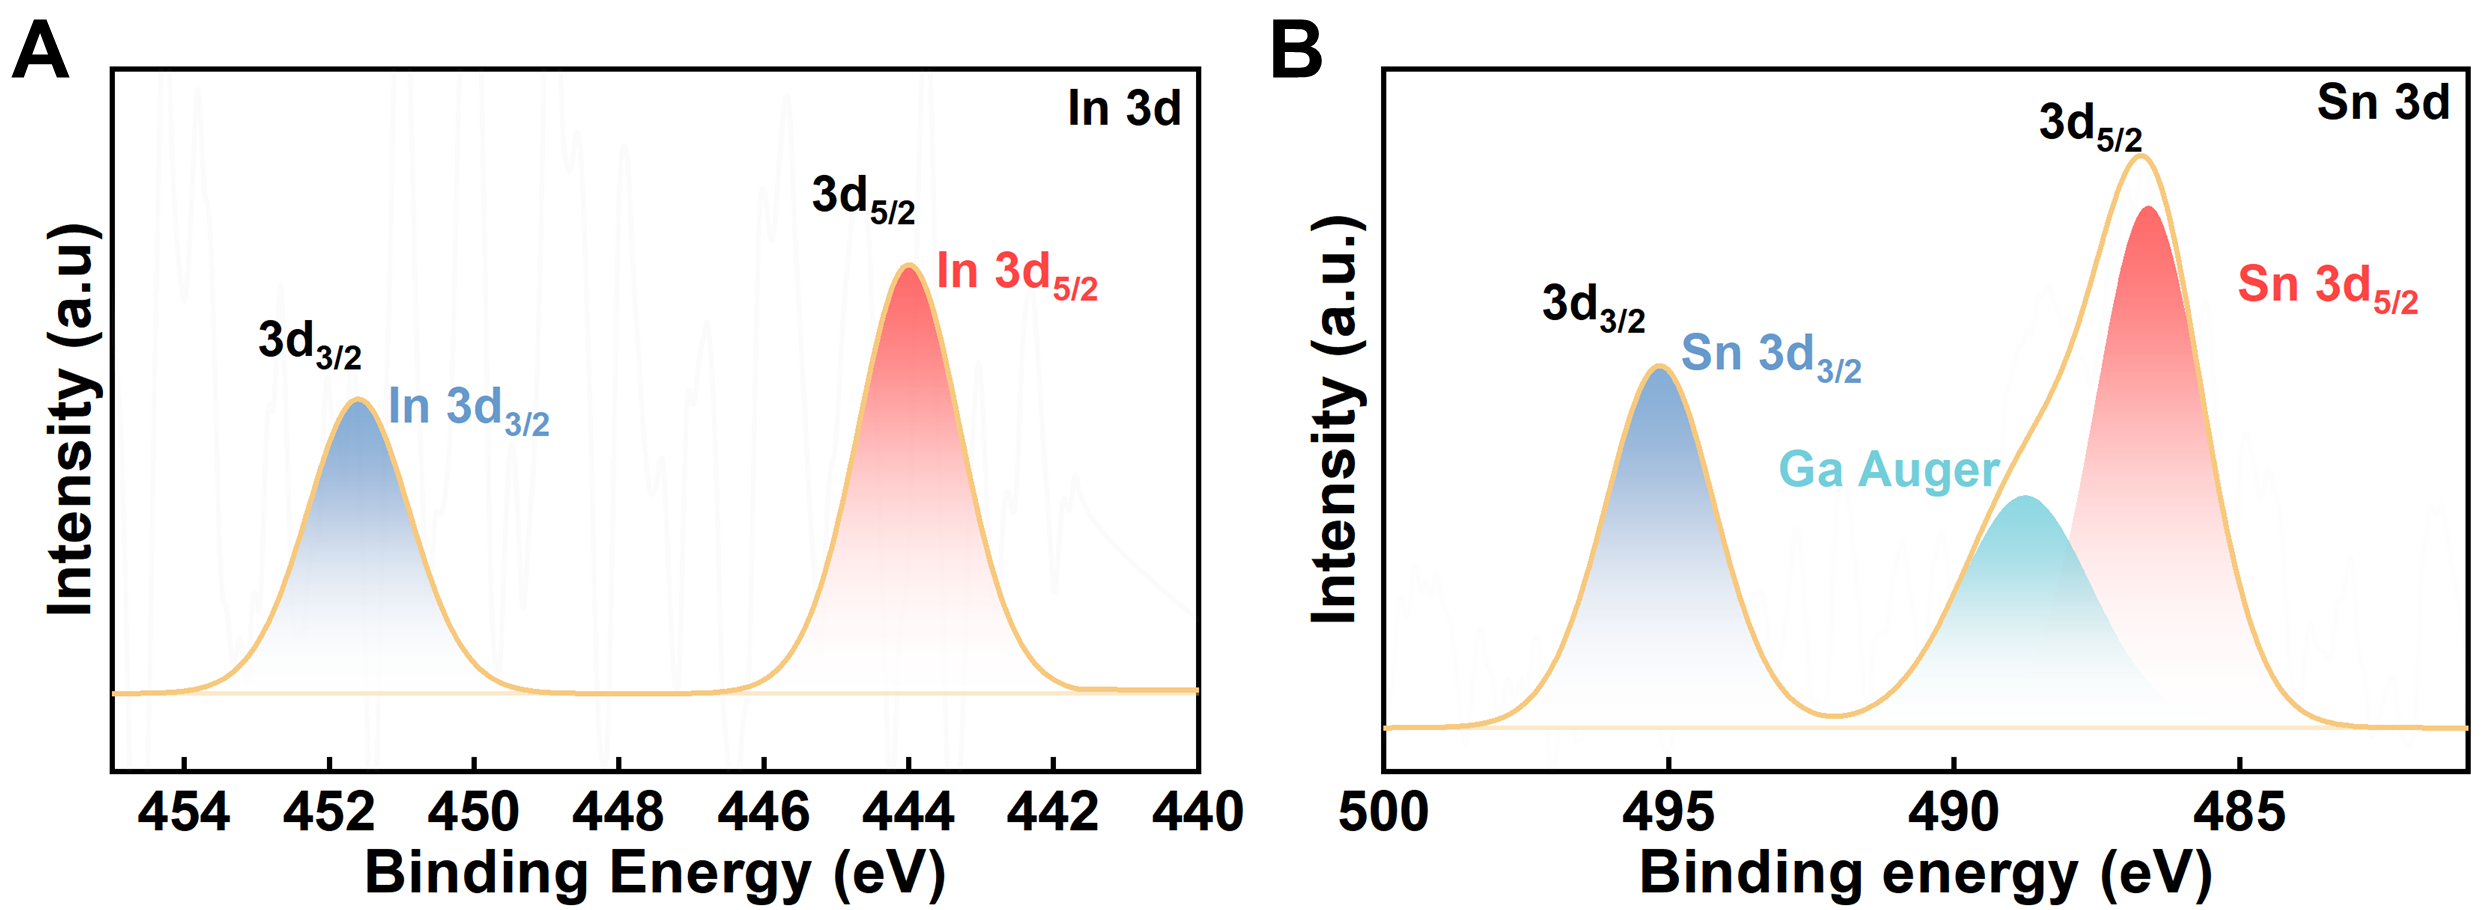


Supplementary Fig. 4 | High resolution XPS spectra of perovskite HEC. High-resolution XPS spectra of (A) In 3d and (B) Sn 3d.


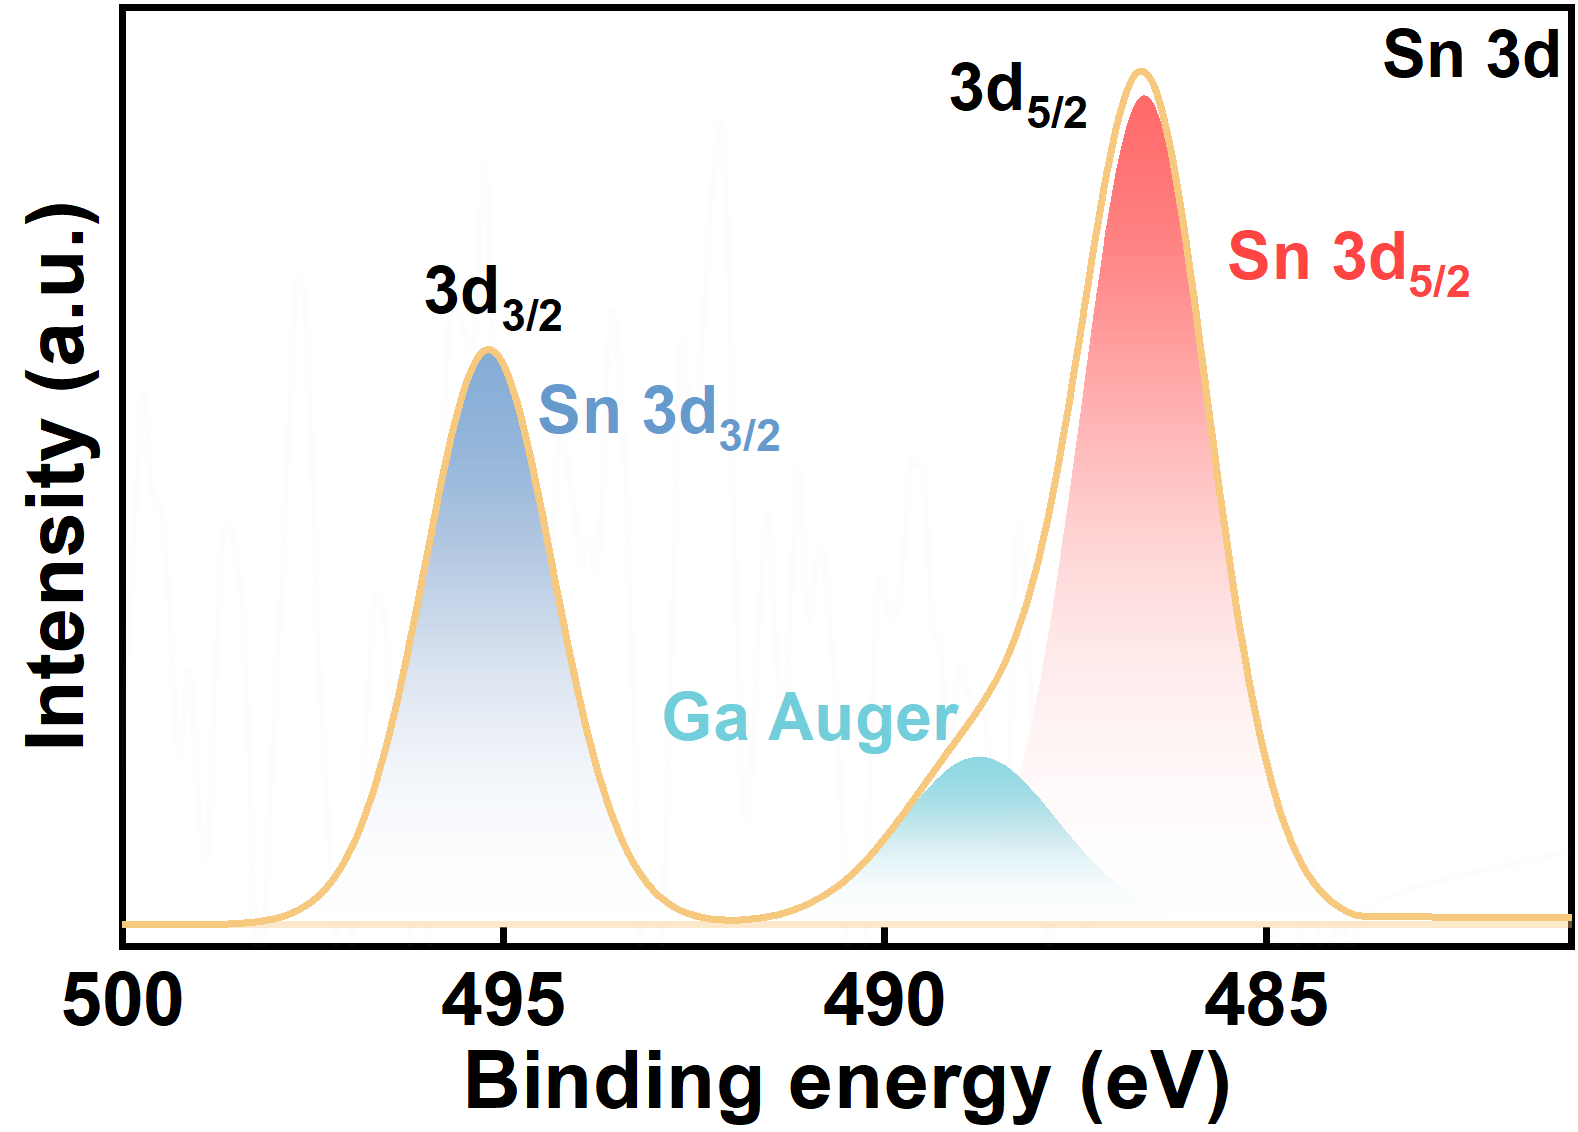


Supplementary Fig. 5 | High-resolution XPS spectra of Sn 3d of rock-salt HECs.

**
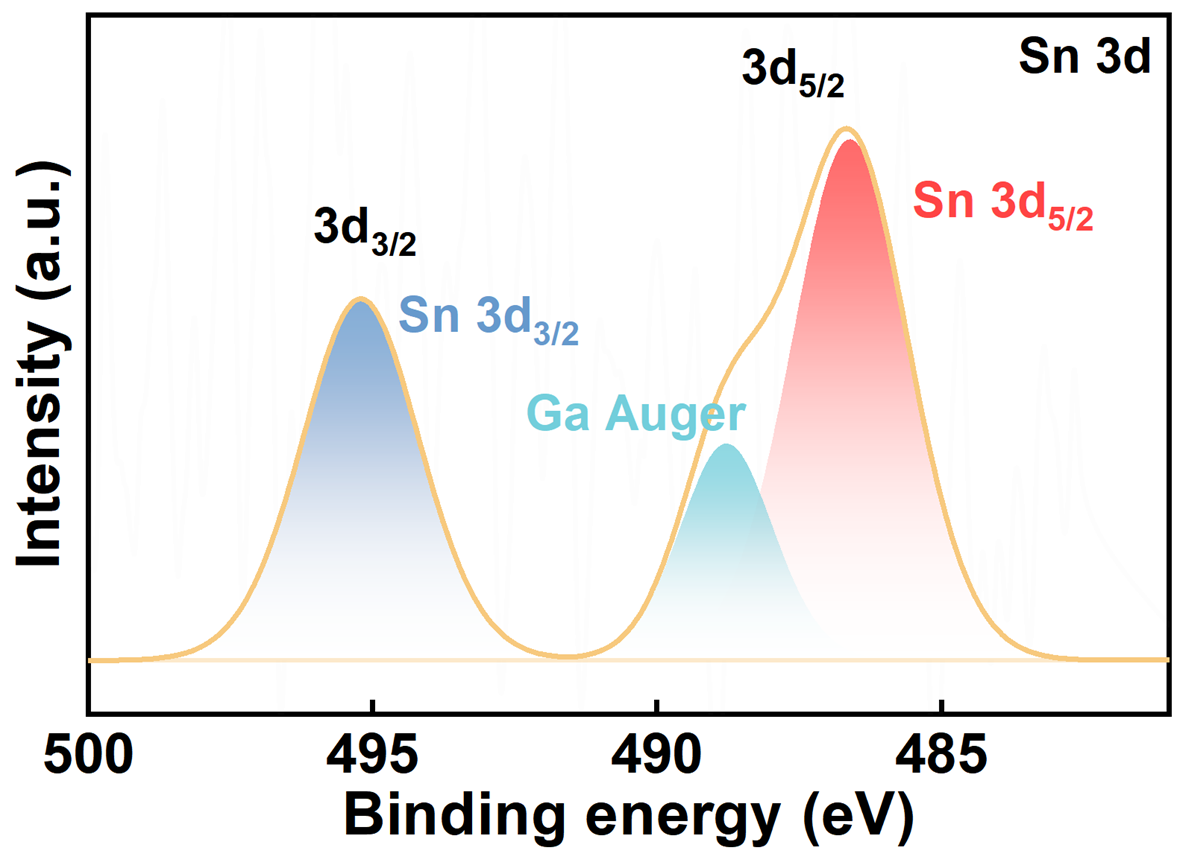
**

Supplementary Fig. 6 | High-resolution XPS spectra of Sn 3d of pyrite HECs.

**
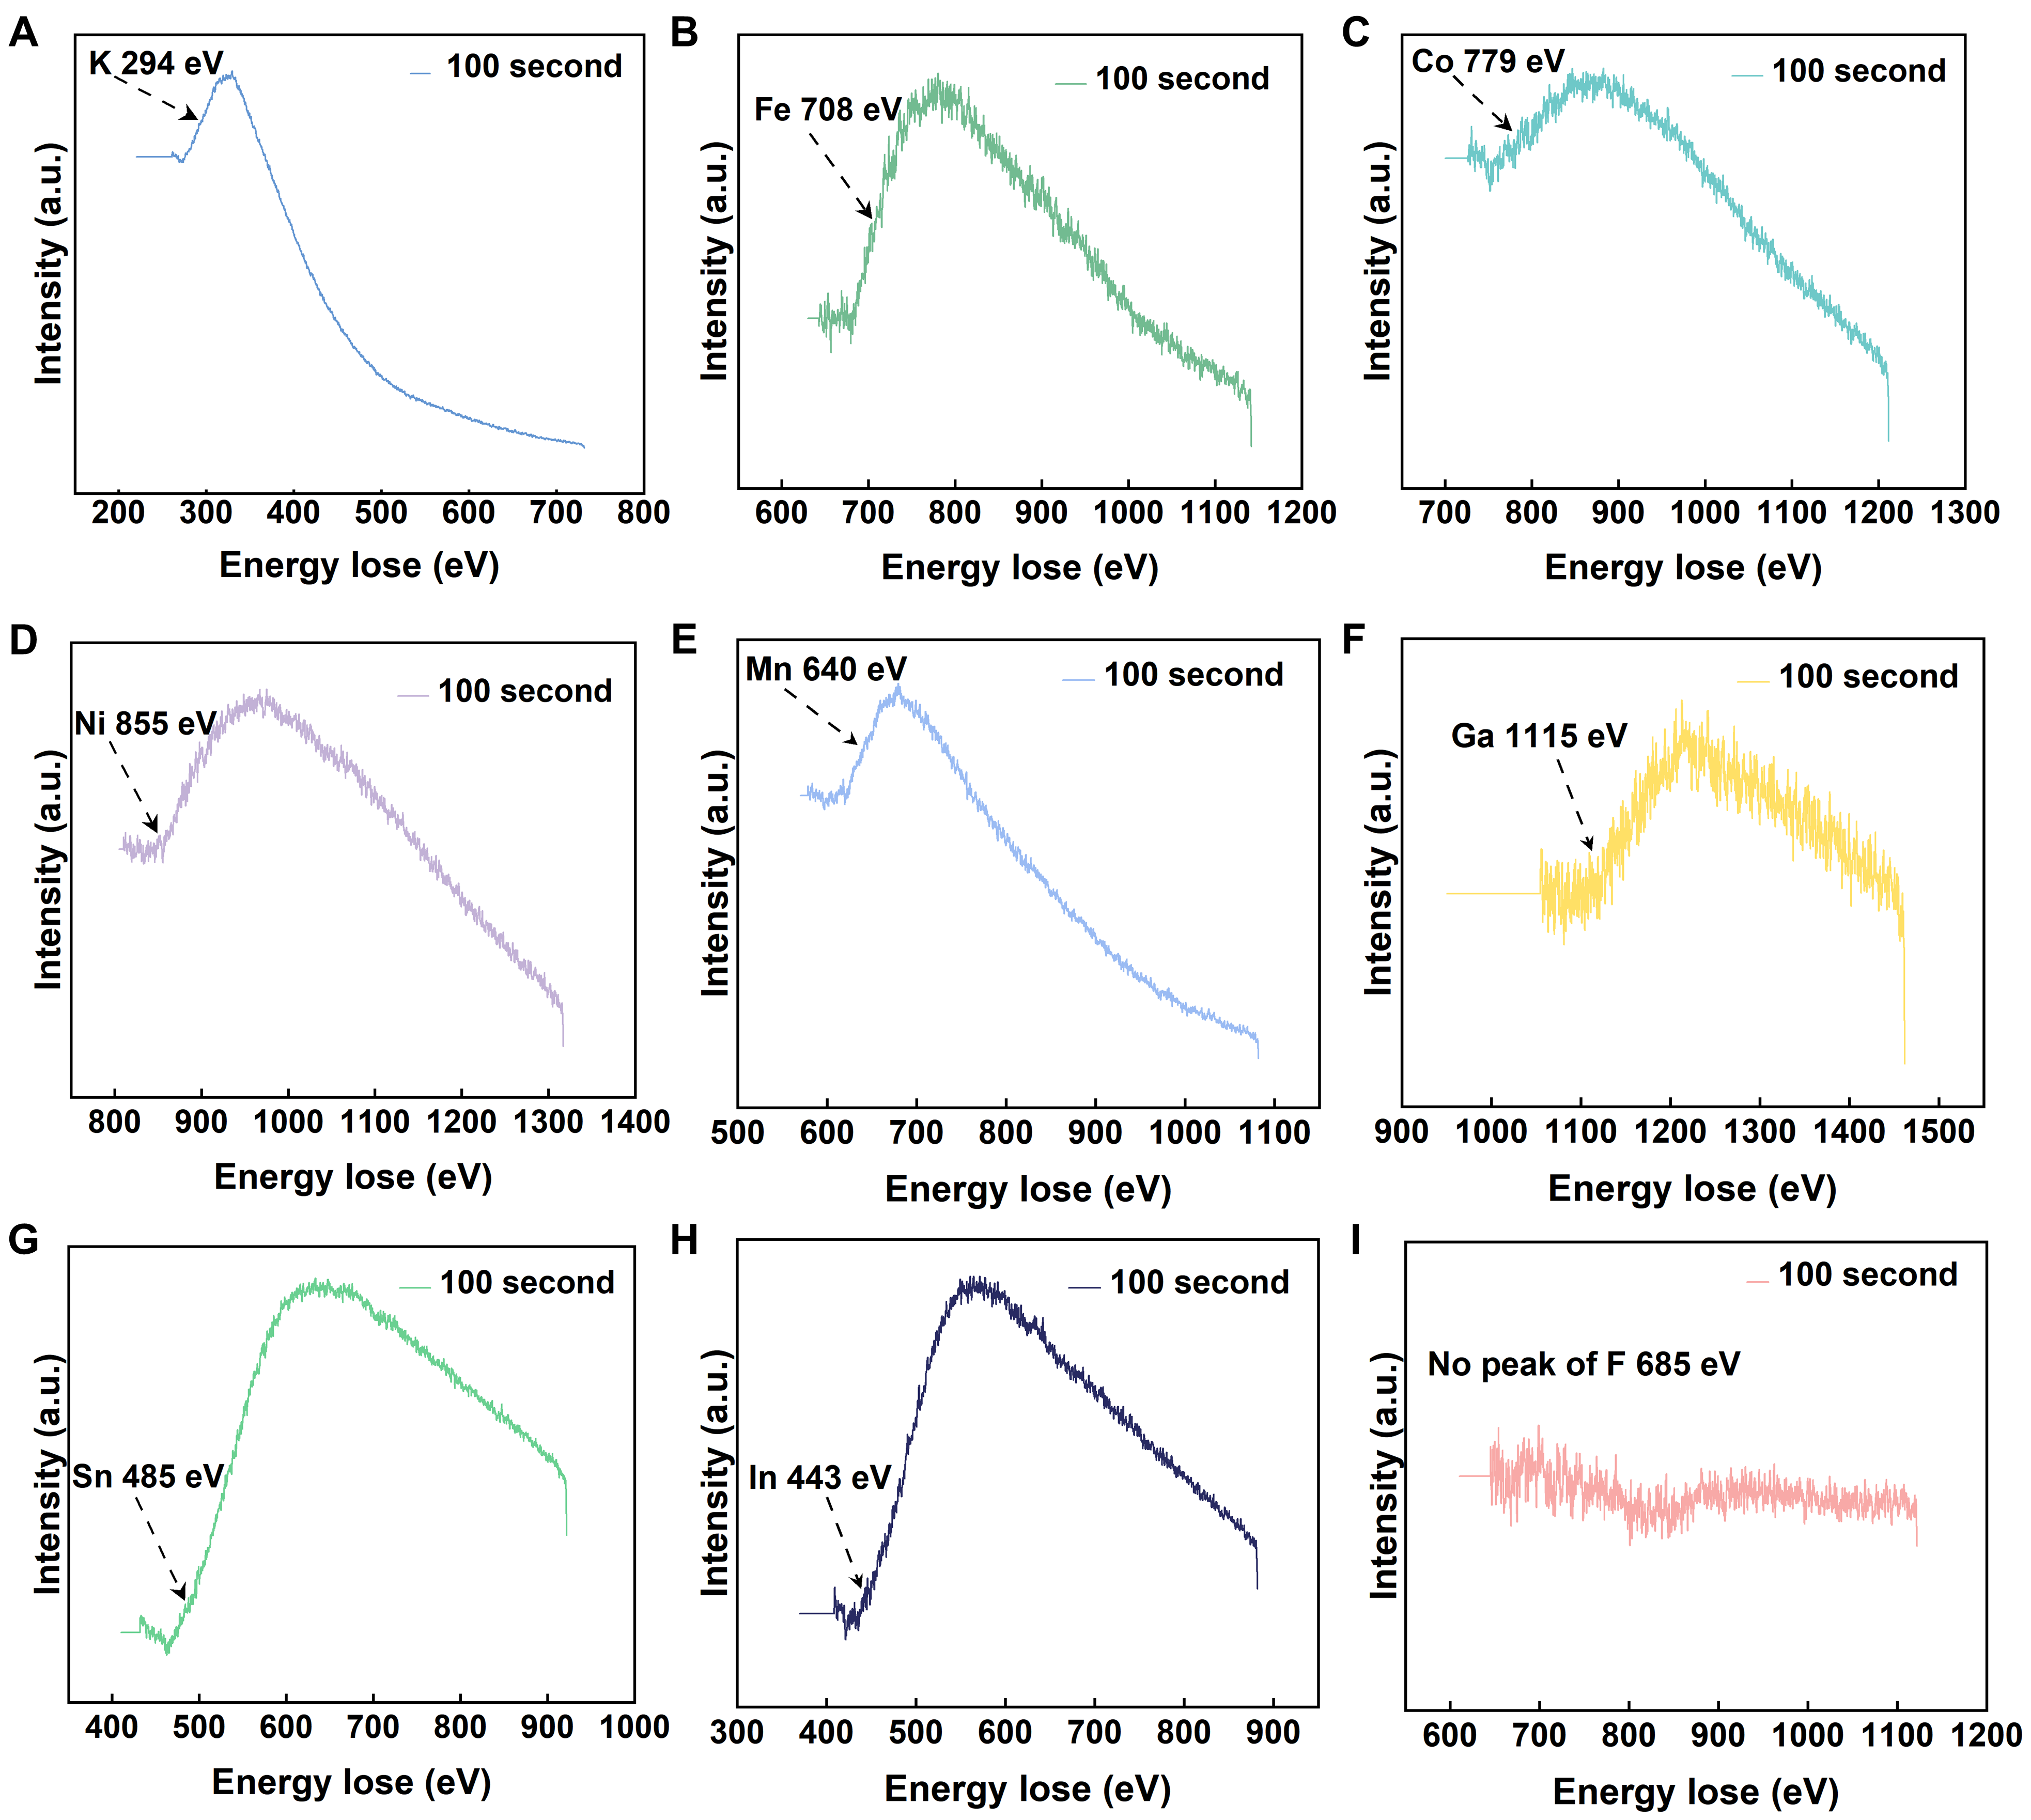
**

Supplementary Fig. 7 | Electron energy loss spectrum in the dark black region at 100s. The characteristic energy loss spectrum of (A) K, (B) Fe, (C) Co, (D) Ni, (E) Mn, (F) Ga, (G) Sn, and (H) In. The absence of a detectable F edge in (I) indicates that F is not present in the analyzed region at 100 s.

**
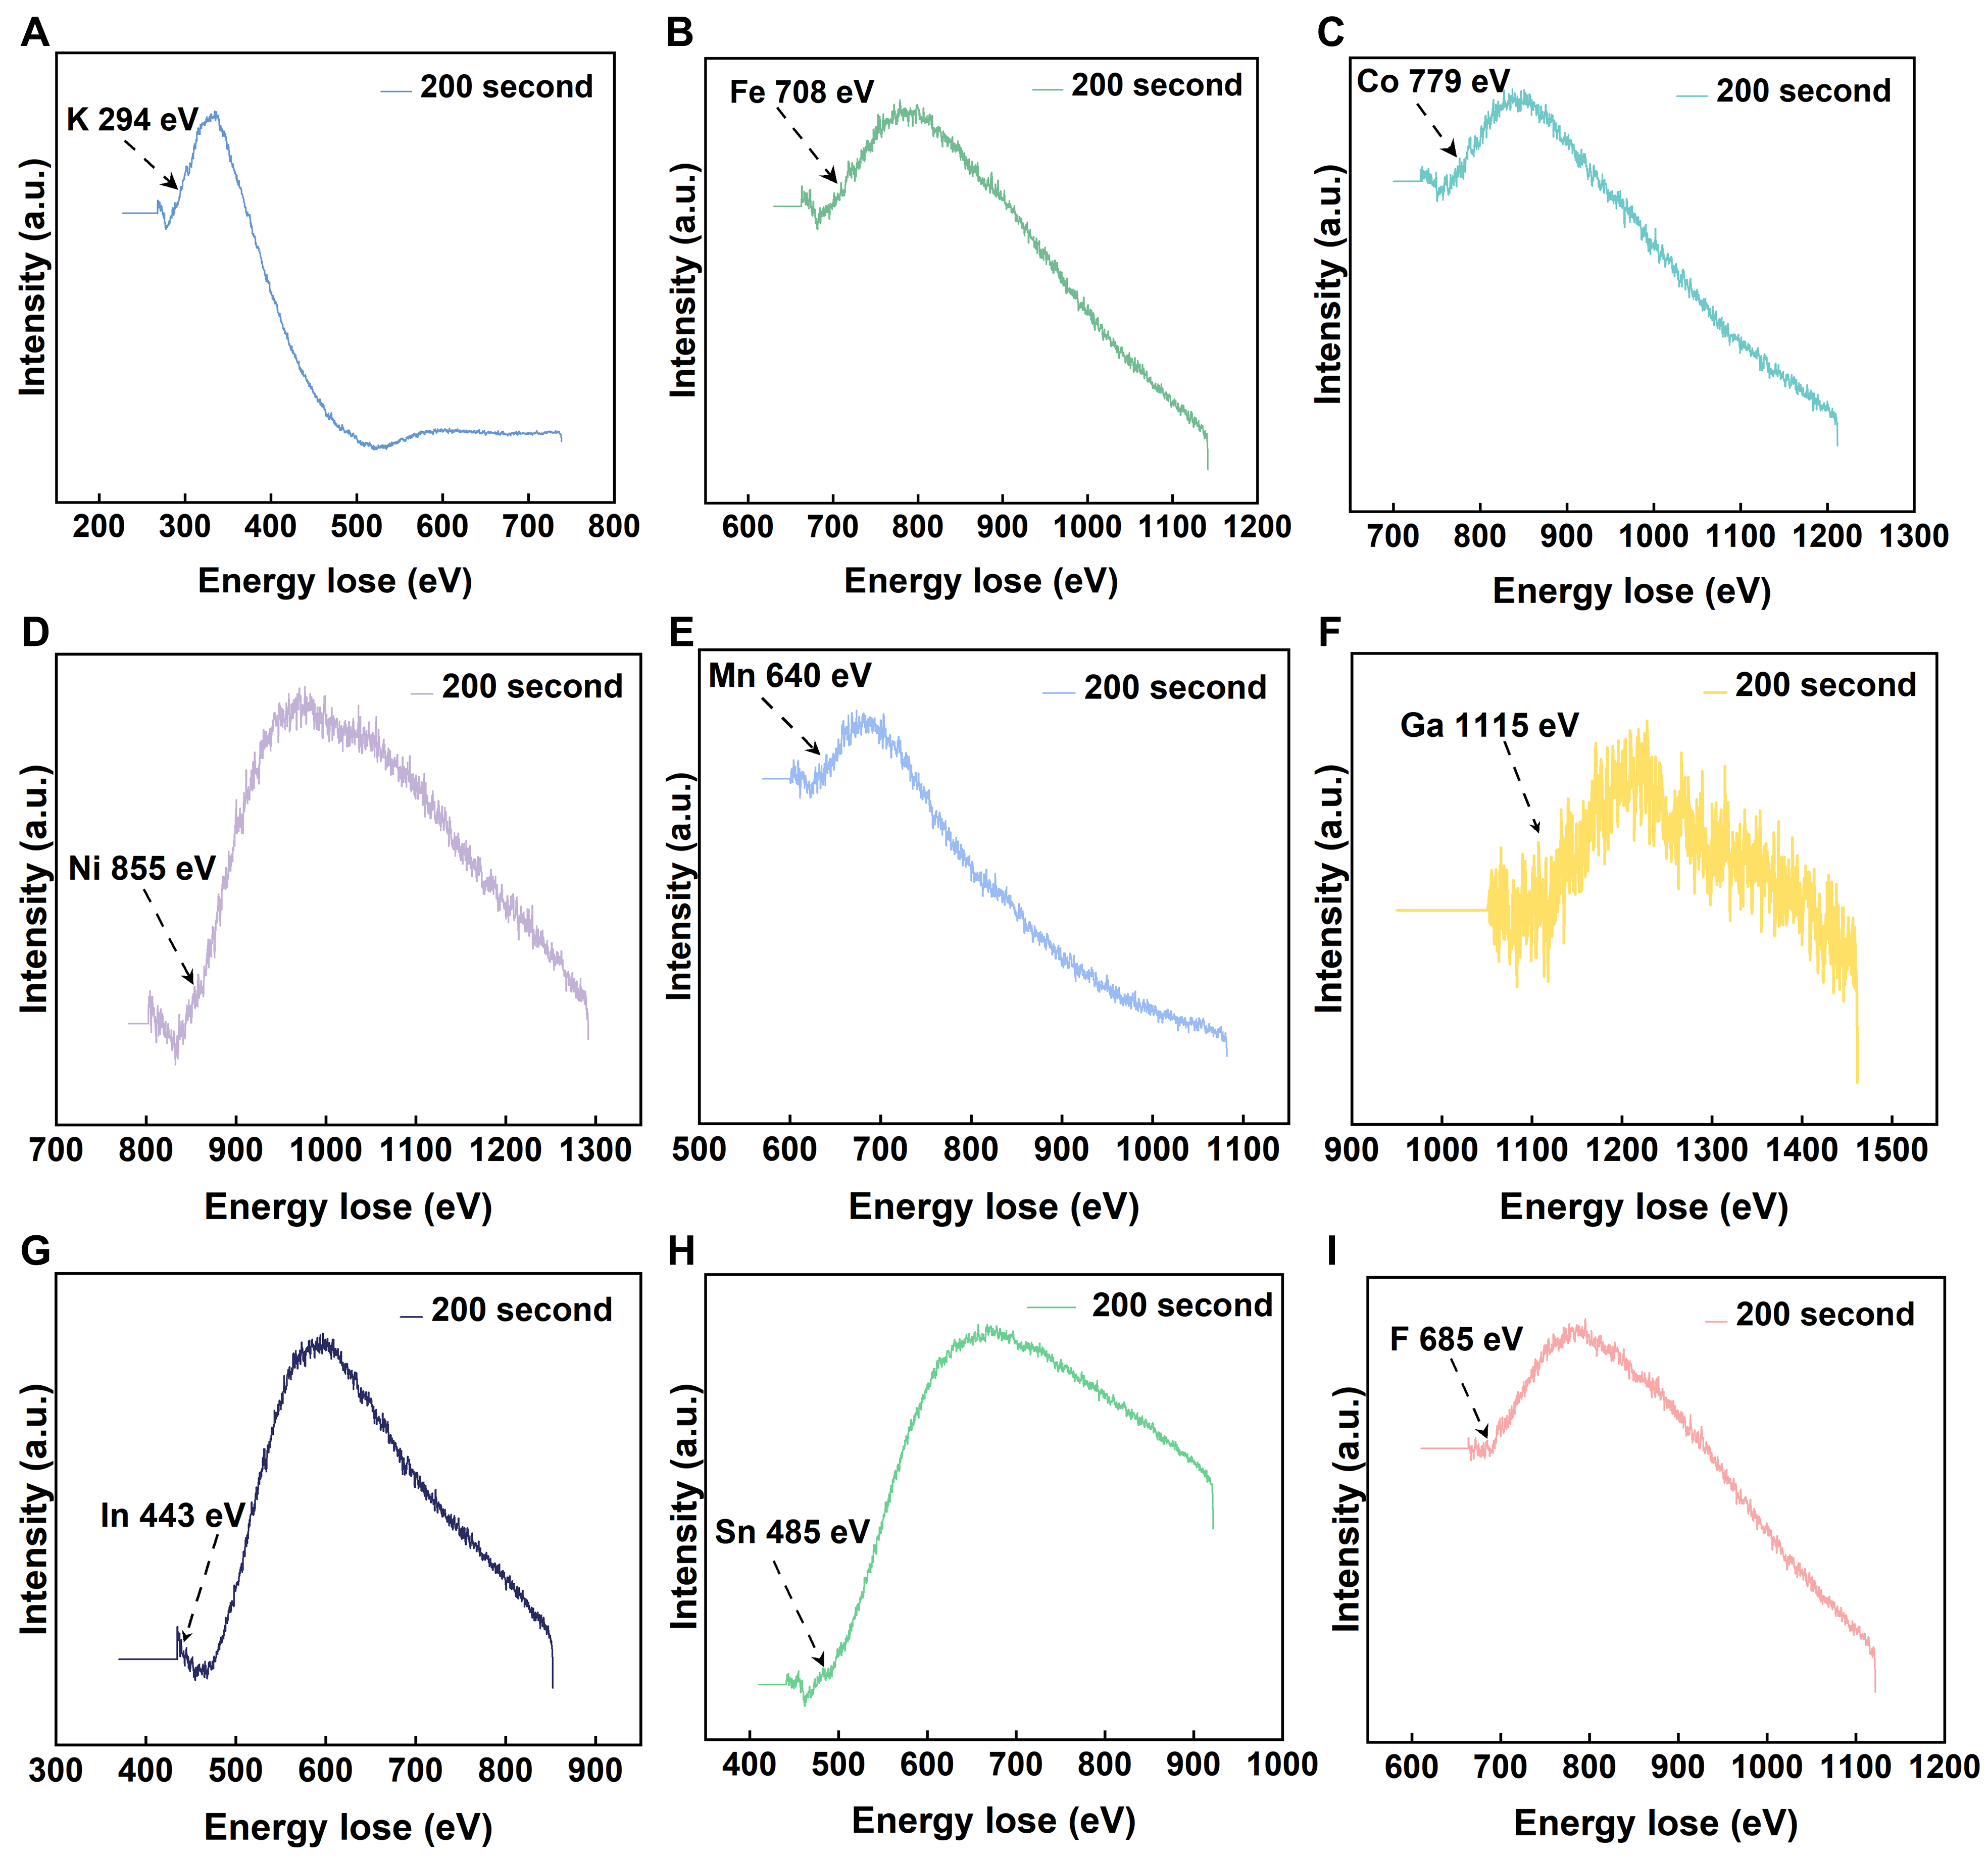
**

Supplementary Fig. 8 | Electron energy loss spectrum in the dark black region at 100s. The characteristic energy loss spectrum of (A) K, (B) Fe, (C) Co, (D) Ni, (E) Mn, (F) Ga, (G) Sn, (H) In, and (I) F.


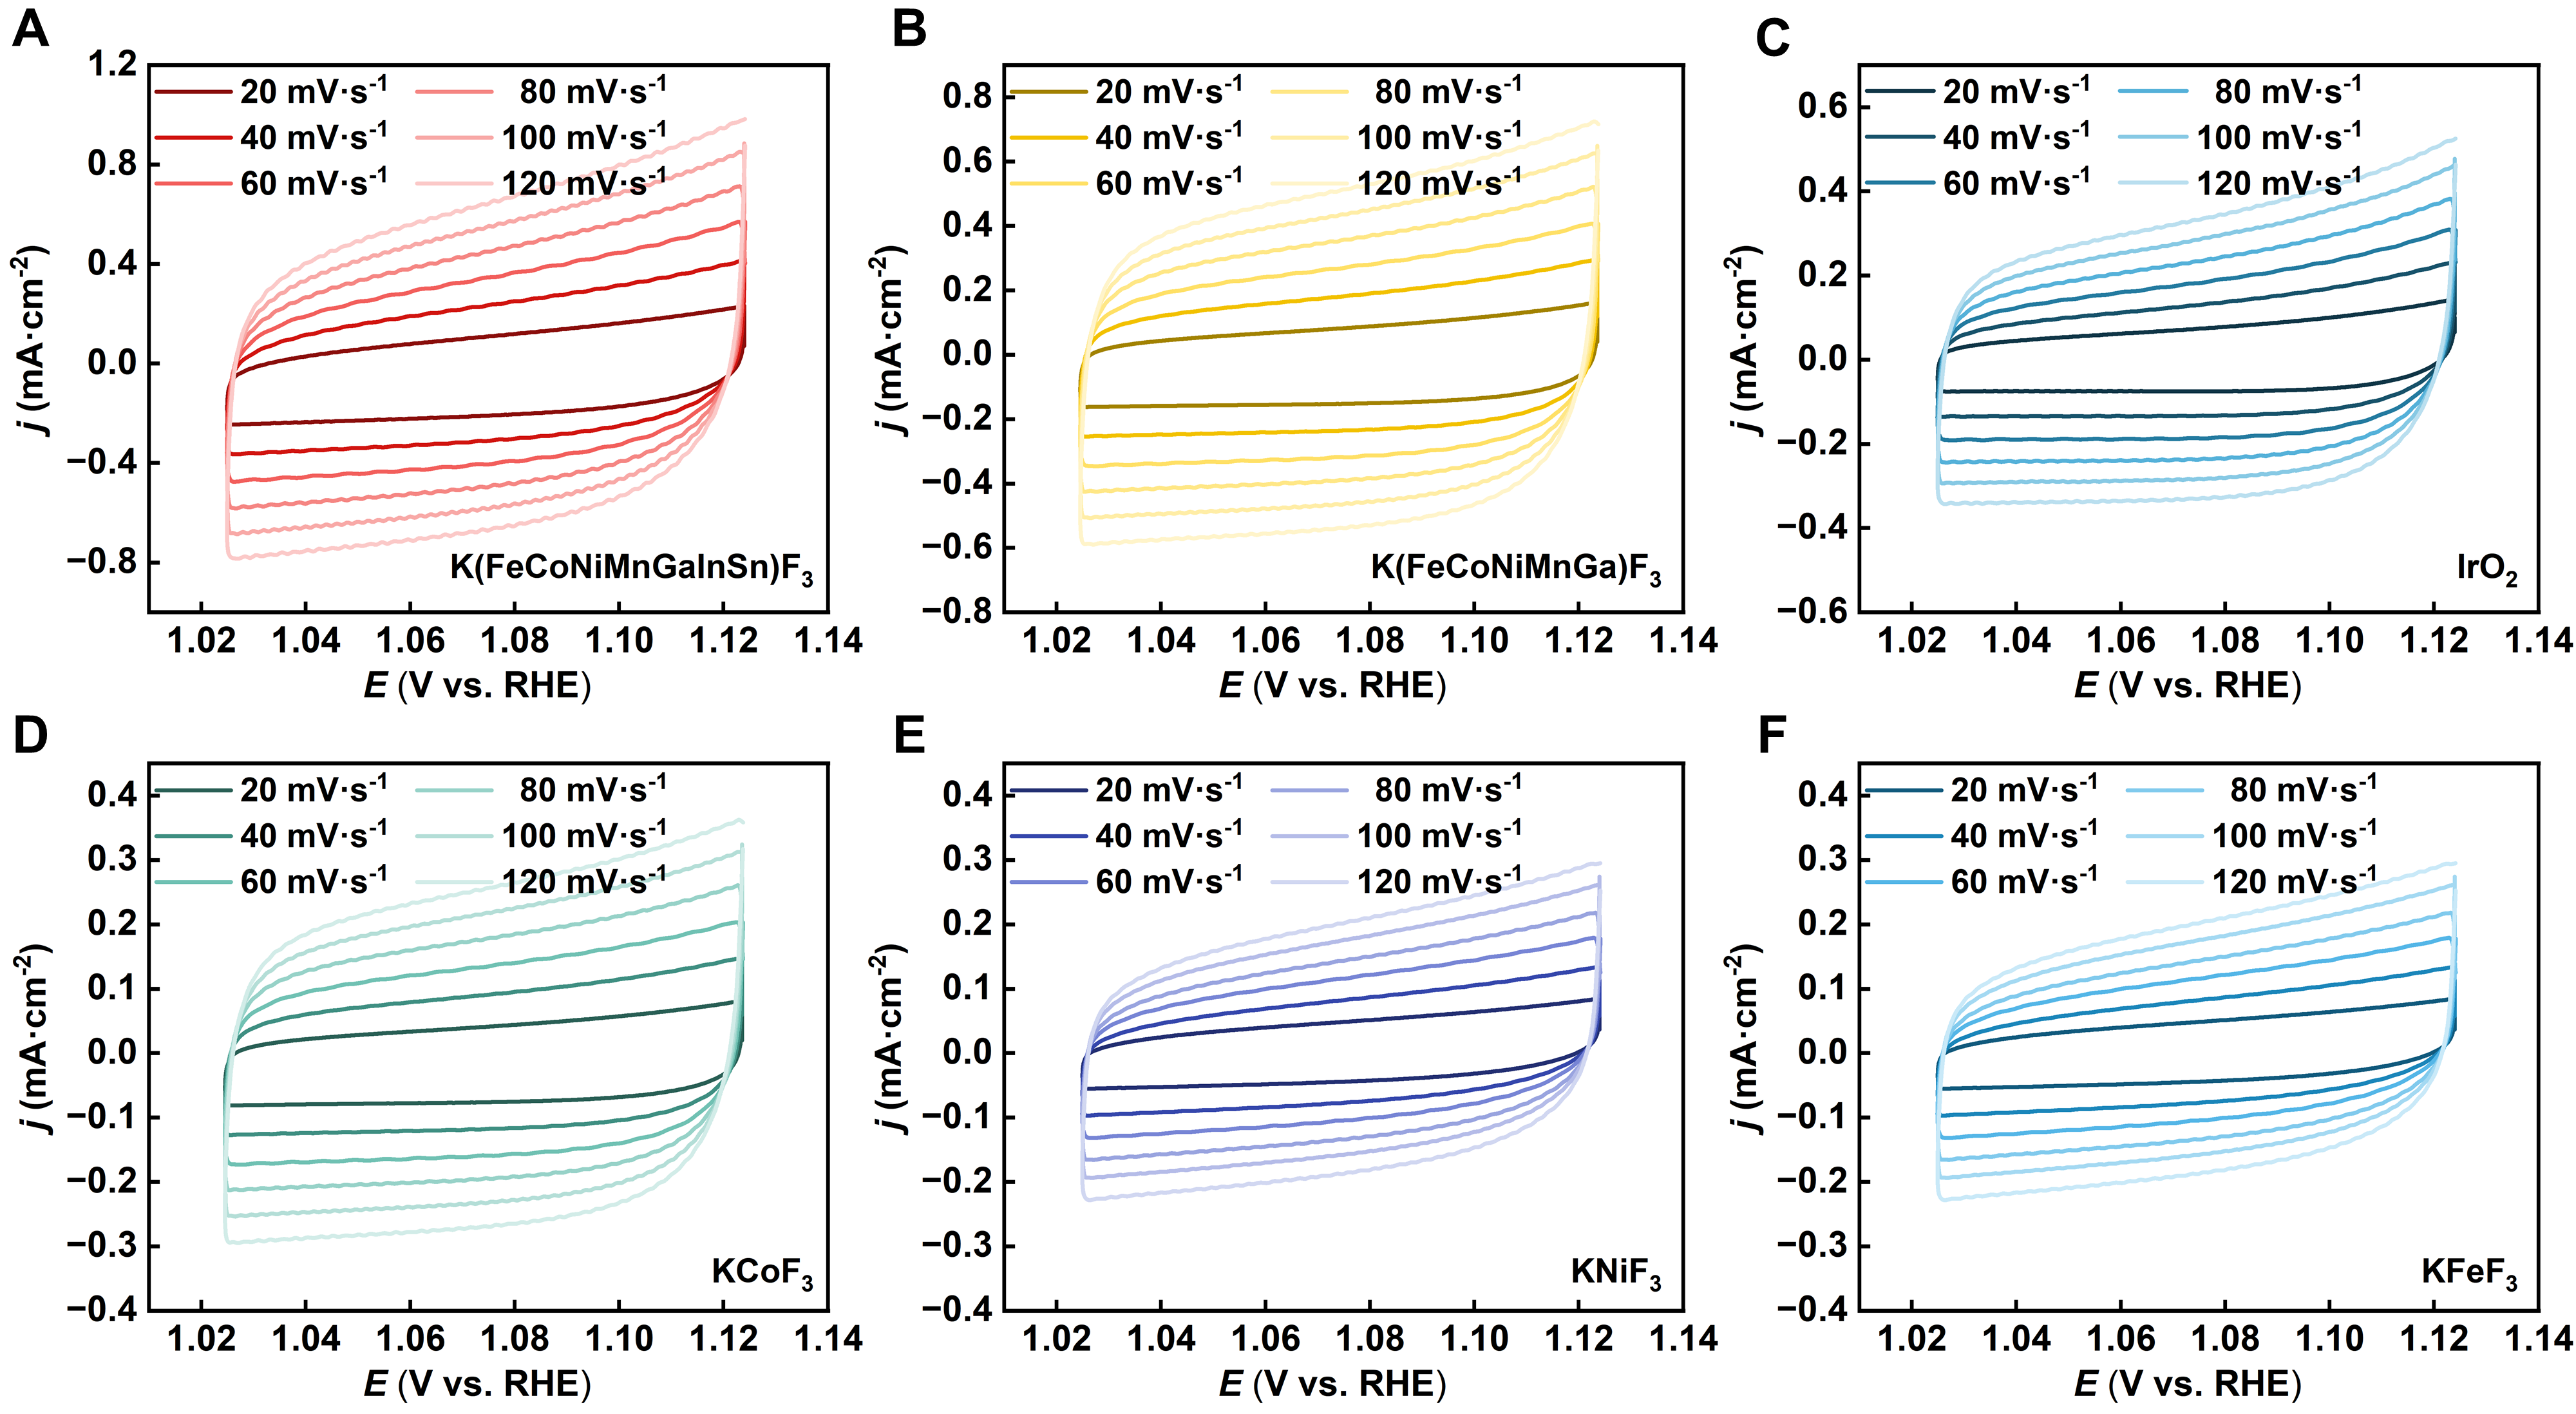


Supplementary Fig. 9 | Measurement of double-layer capacitance. Cyclic voltammetry cycles for (A) K(Fe0.2Co0.2Ni0.2Mn0.2Ga0.14In0.04Sn0.02)F3, (B) K(Fe0.2Co0.2Ni0.2Mn0.2Ga0.2)F3, (C) IrO2, (D) KCoF3, (E) KNiF3 and (F) KFeF3 at different scan rates.


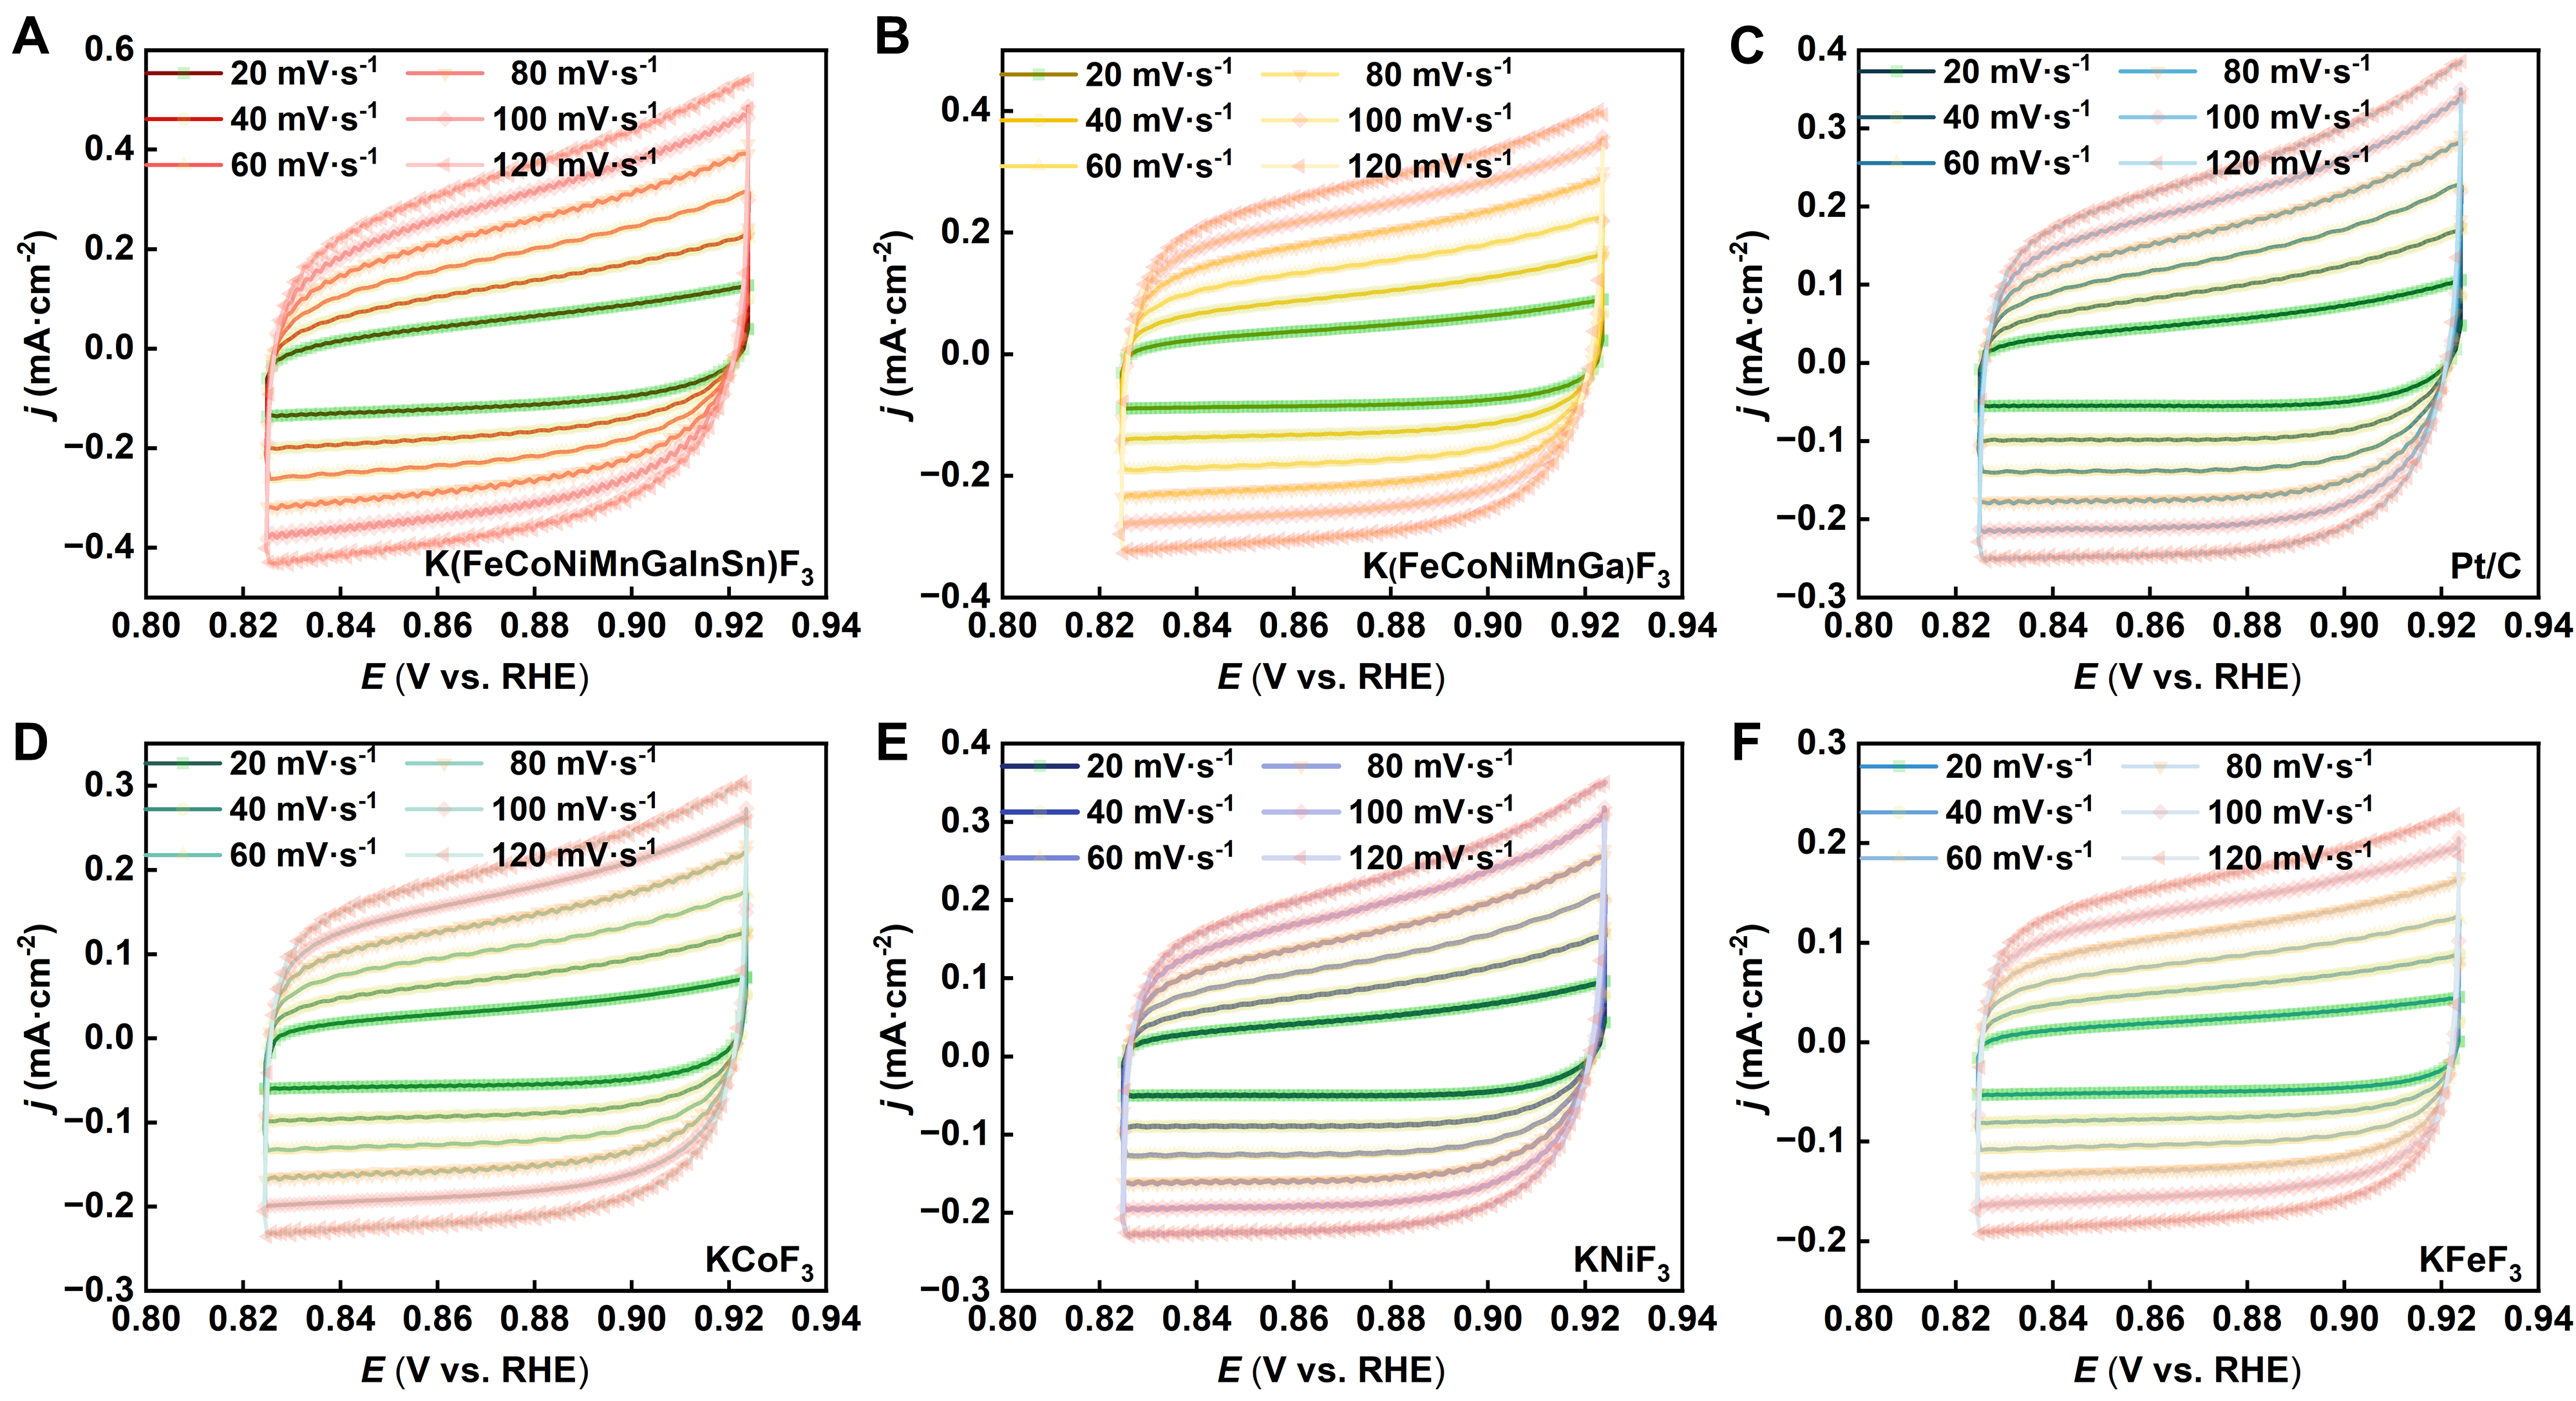


Supplementary Fig. 10 | Measurement of double-layer capacitance. Cyclic voltammetry cycles for (A) K(Fe0.2Co0.2Ni0.2Mn0.2Ga0.14In0.04Sn0.02)F3, (B) K(Fe0.2Co0.2Ni0.2Mn0.2Ga0.2)F3, (C) Pt/C, (D) KCoF3, (E) KNiF3 and (F) KFeF3 at different scan rates.

**
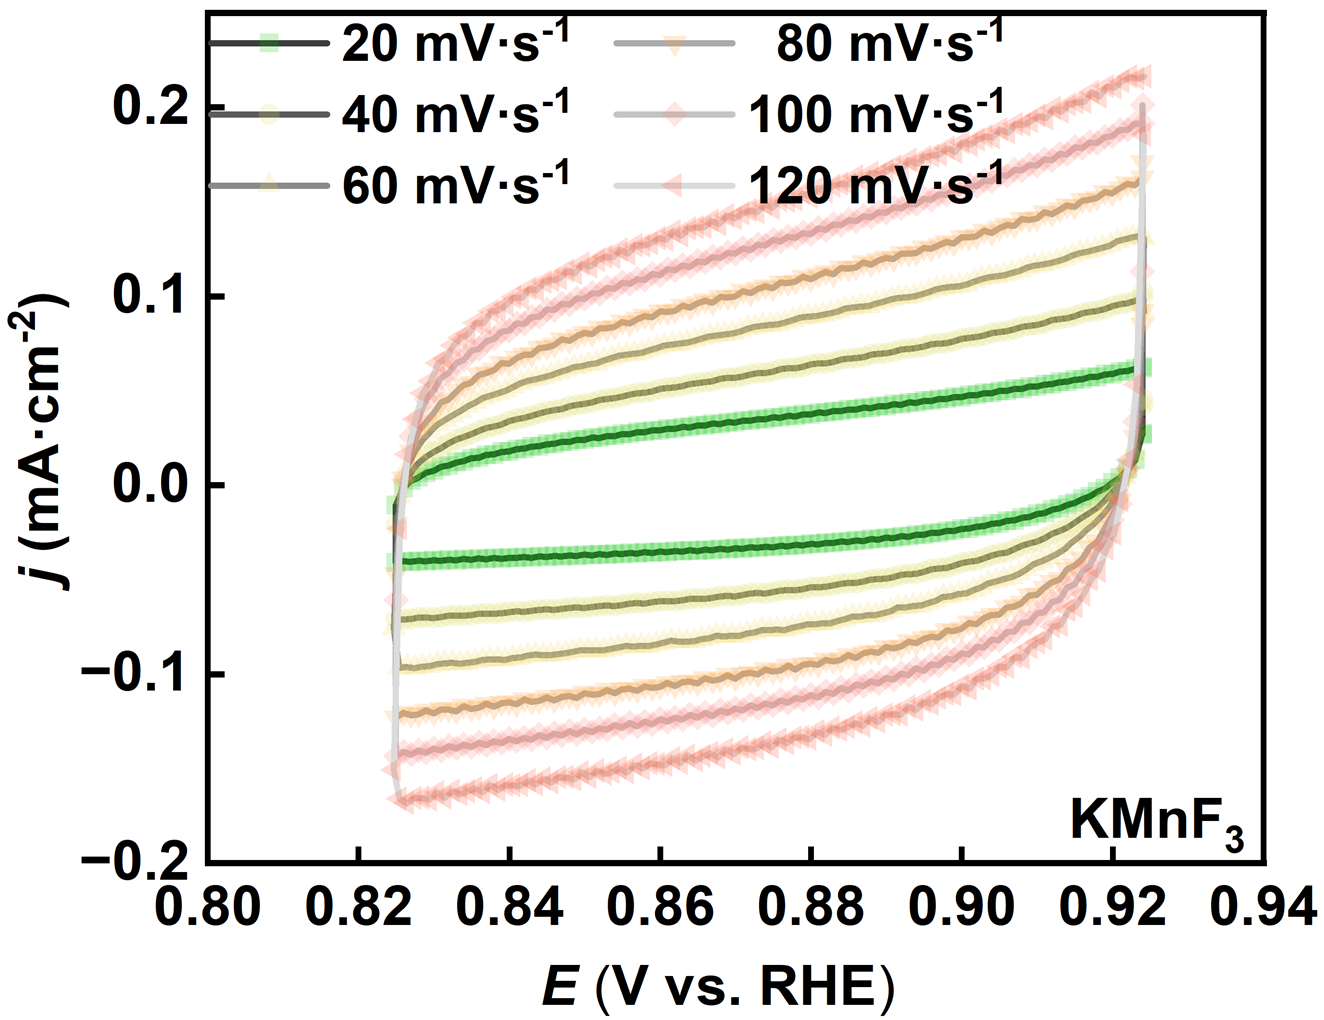
**

Supplementary Fig. 11 | Measurement of double-layer capacitance. Cyclic voltammetry cycles for KMnF3 at different scan rates.


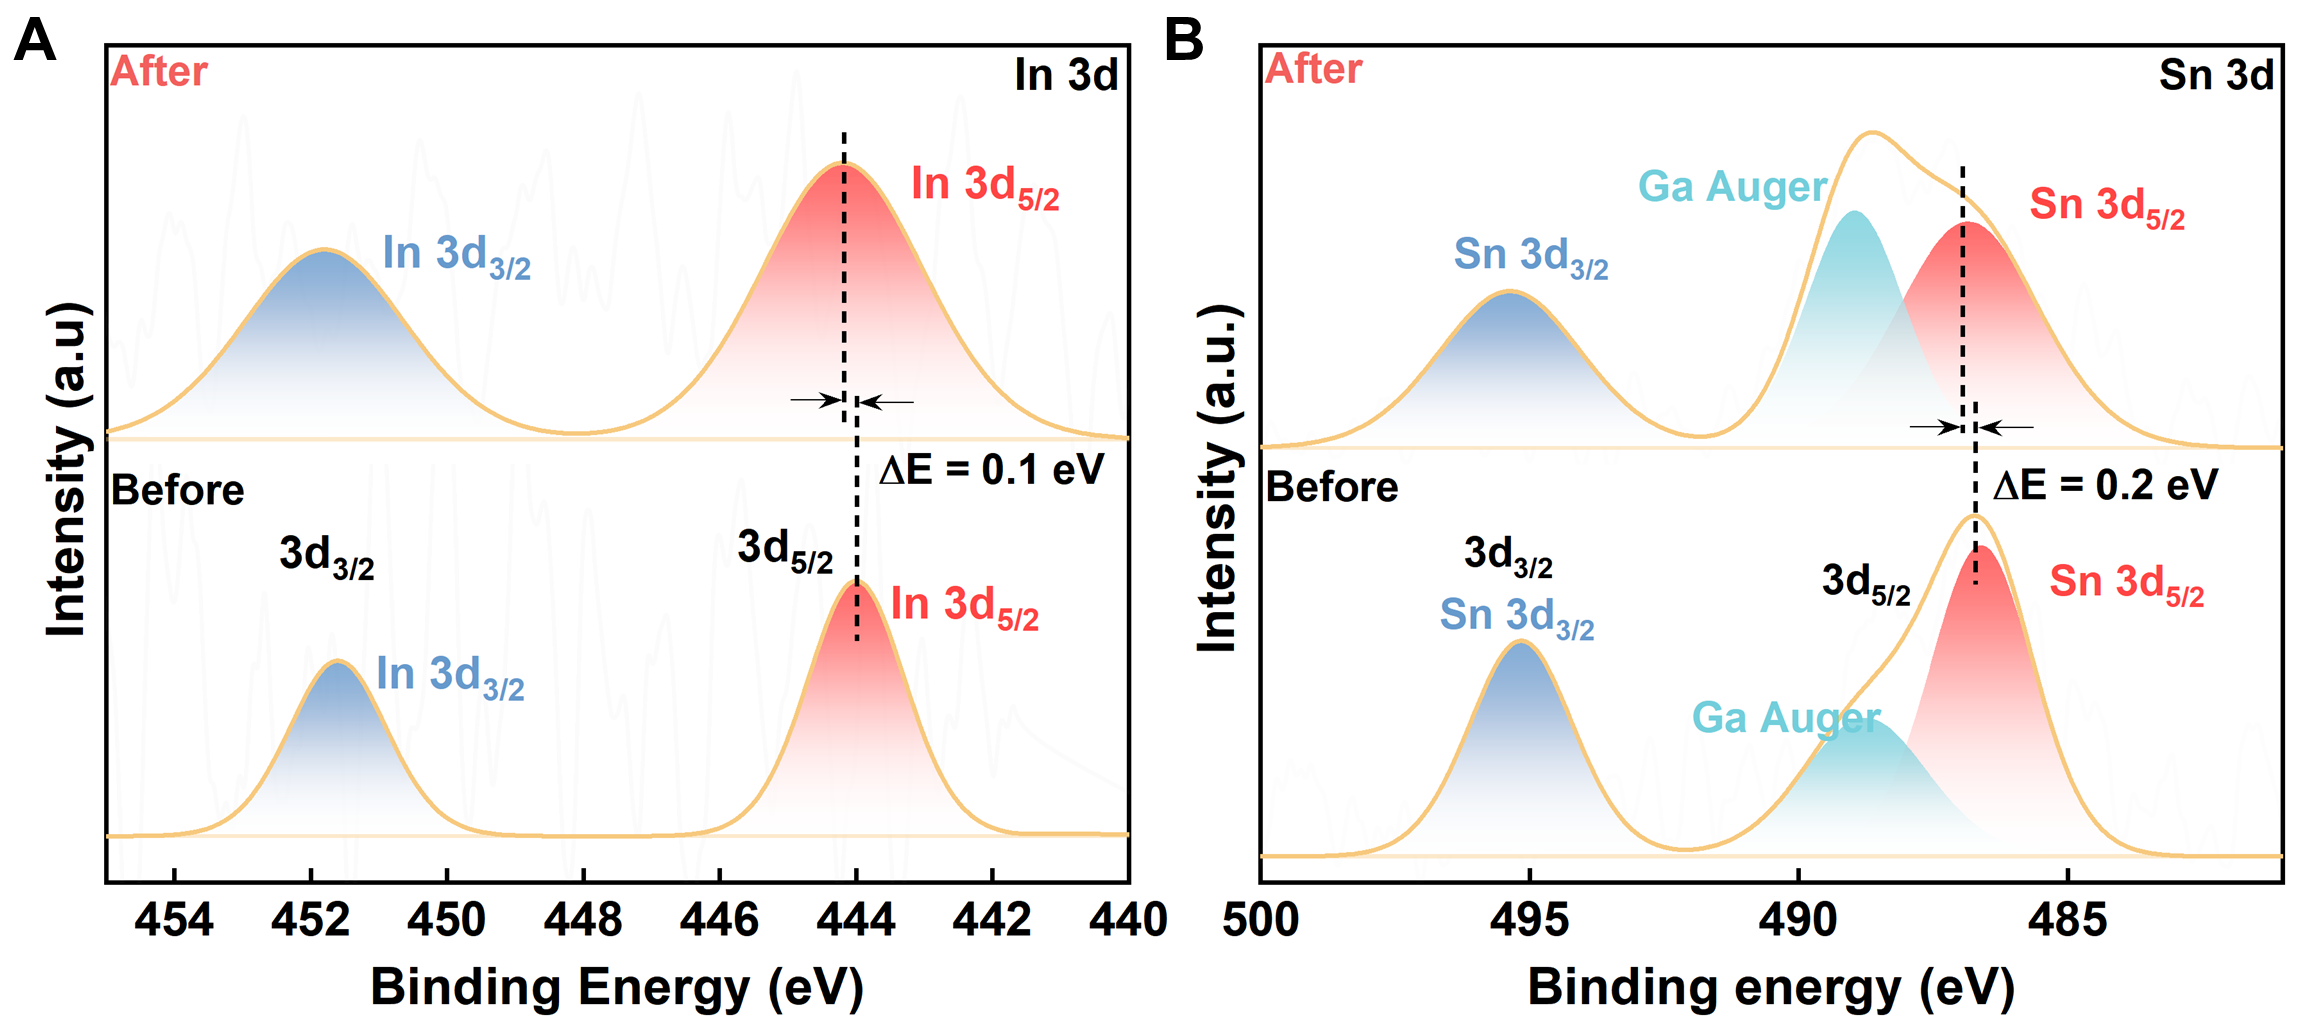


Supplementary Fig. 12 | XPS analysis of perovskite HECs before and after electrocatalysis. XPS spectra of (A) In 3d and (B) Sn 3d.


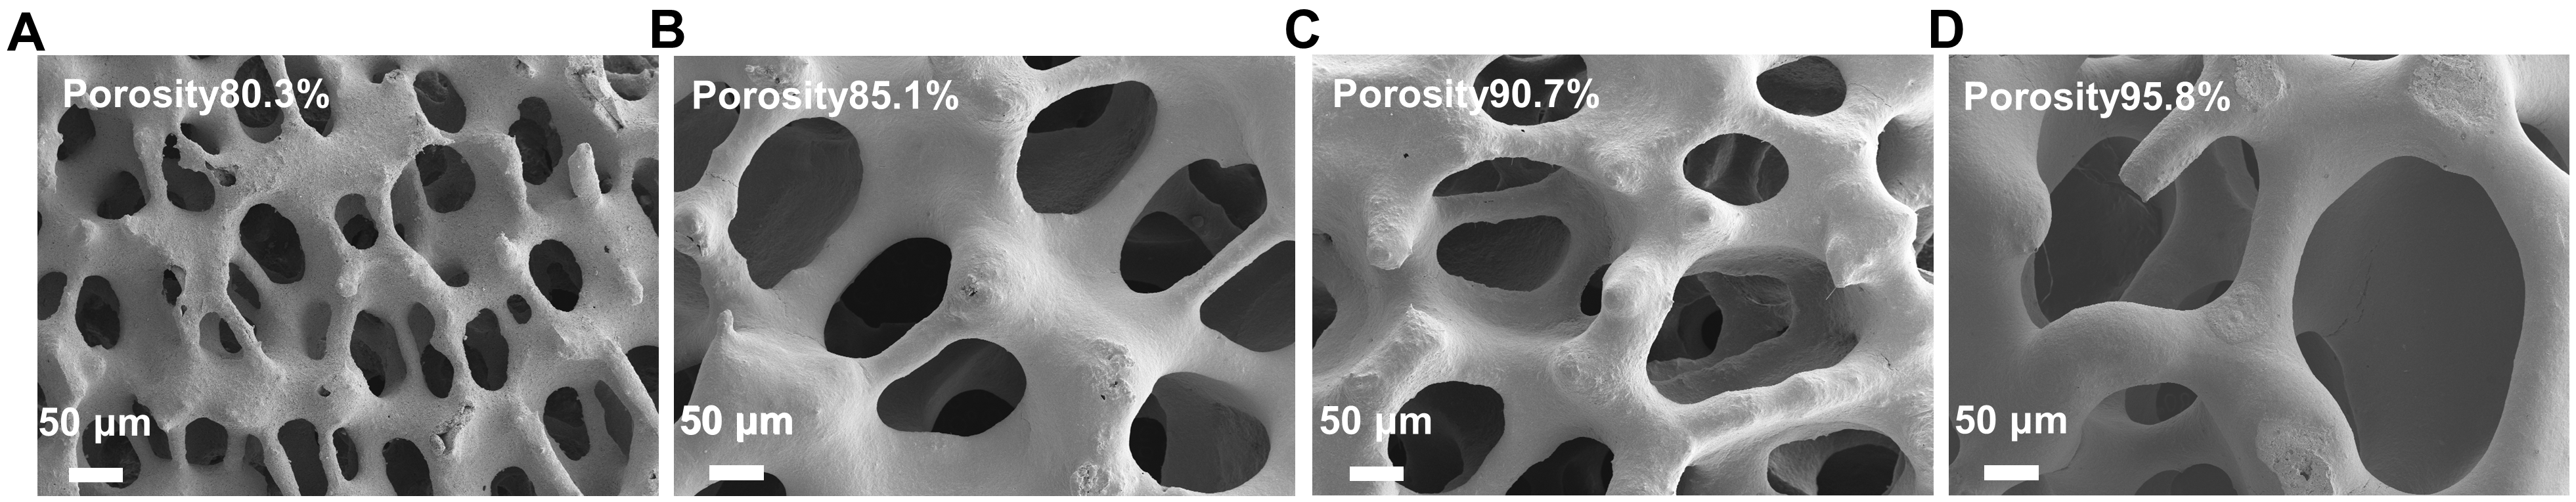


Supplementary Fig. 13 | Microscopic morphology of high-entropy carbide. A to D, SEM images of interconnected pore network and cell walls of porous high-entropy carbide samples.


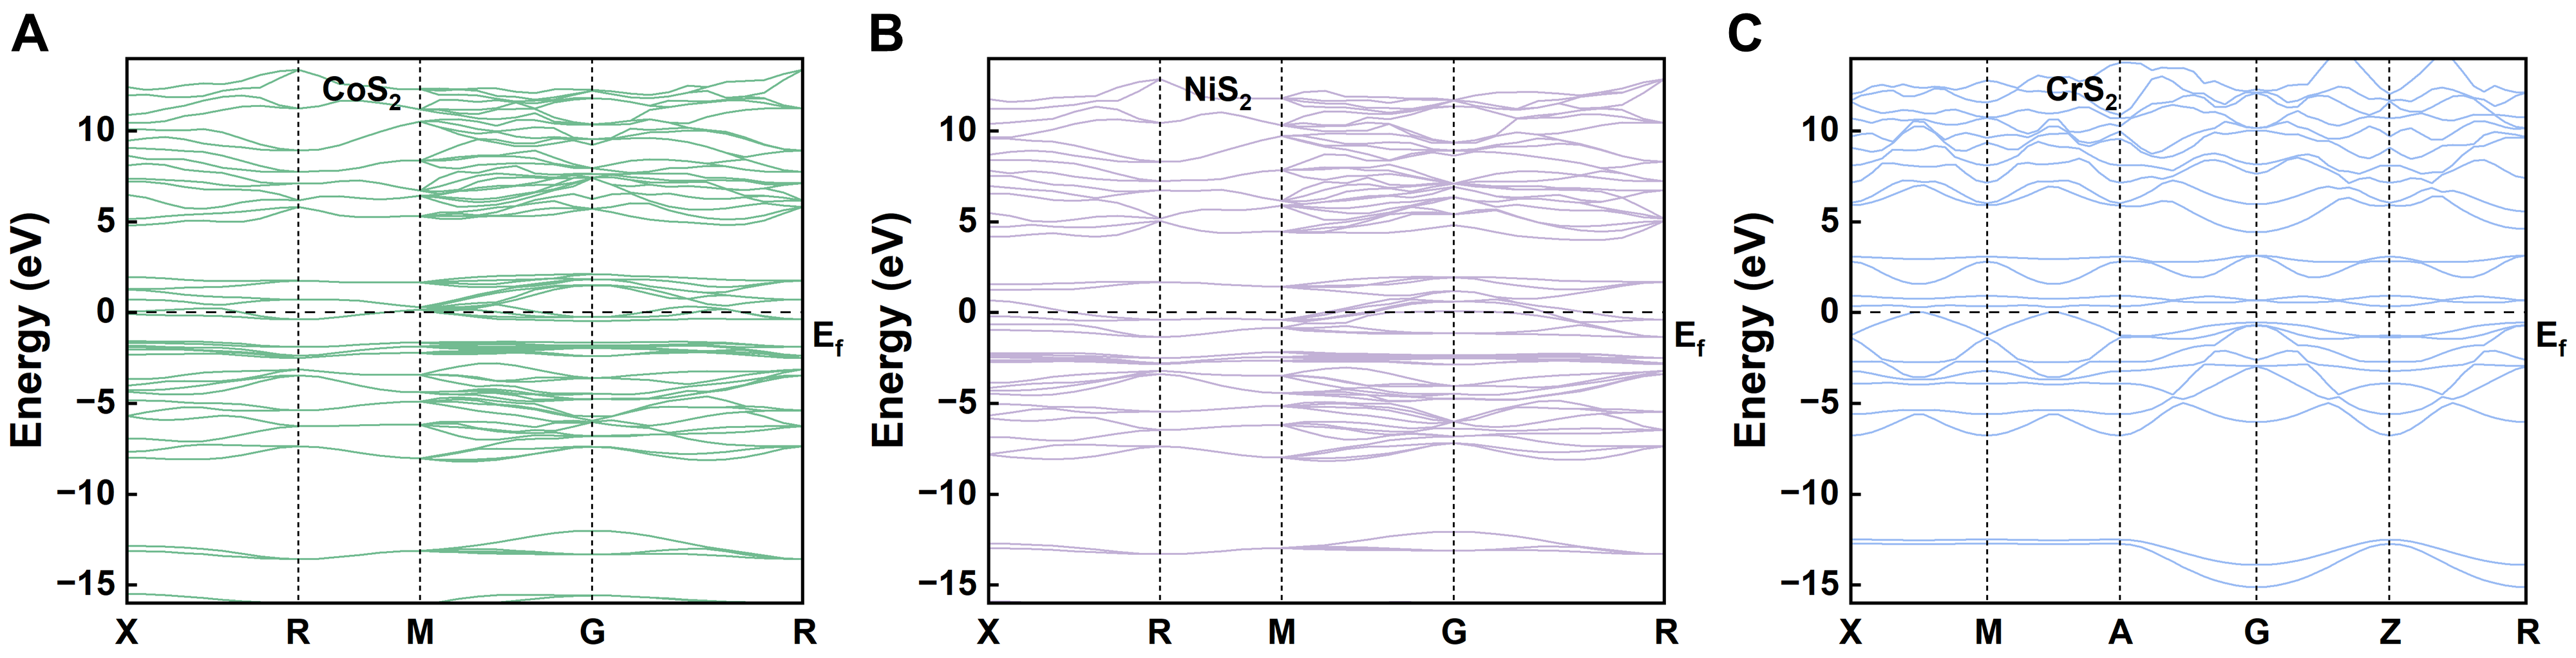


Supplementary Fig. 14 | The band structures of low entropy sulfides. The band structures of (A) CoS2, (B)NiS2, and (C) CrS2.


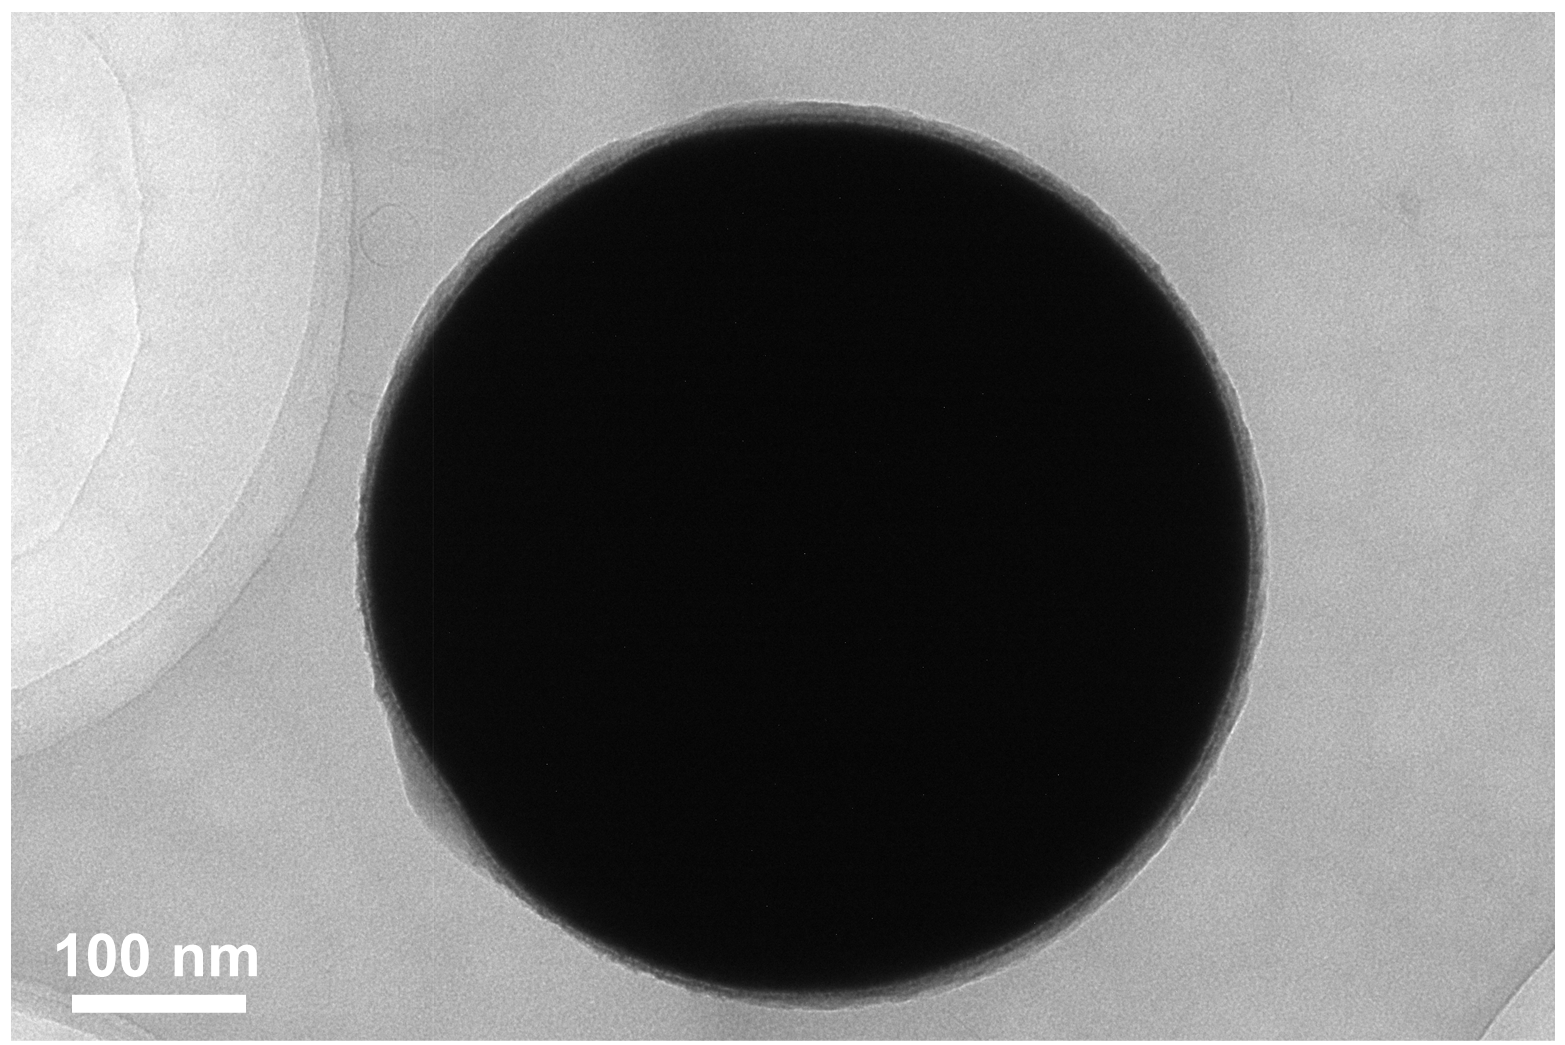


Supplementary Fig. 15 | Morphological size distribution of liquid metal particles.

Supplementary Table 1 | The mixing enthalpy () and mixing entropy () of liquid metal Galinstan, Ga, and liquid metal free samples.

| System | (kJ/mol) | (J/mol·K) |
| --- | --- | --- |
| K(Fe0.2Co0.2Ni0.2Mn0.2Ga0.14In0.04Sn0.02)F3 | −4.8 | 14.71 |
| K(Fe0.2Co0.2Ni0.2Mn0.2Ga0.2)F3 | −4.7 | 13.38 |
| K(Fe1/4Co1/4Ni1/4Mn1/4)F3 | −0.8 | 11.53 |
| (Hf0.2Ta0.2Nb0.2Mo0.2Ga0.14In0.04Sn0.02)C | −23.5 | 14.71 |
| (Hf0.2Ta0.2Nb0.2Mo0.2Ga0.2)C | −22.8 | 13.38 |
| (Hf1/4Ta1/4Nb1/4Mo1/4)C | −18.3 | 11.53 |
| (Fe0.2Co0.2Ni0.2Cr0.2Ga0.14In0.04Sn0.02)S2 | −7.5 | 14.71 |
| (Fe0.2Co0.2Ni0.2Cr0.2Ga0.2)S2 | −7.3 | 13.38 |
| (Fe1/4Co1/4Ni1/4Cr1/4)S2 | −6.0 | 11.53 |

Supplementary Table 2 | Mixing enthalpy (KJ/mol) between two different elements. The mixing enthalpy between Ga and other elements is relatively negative, indicating preferable chemical compatibility.

|  | Ga | Mg | Li | K | Ca | Sc | Ti | Sr | La |
| --- | --- | --- | --- | --- | --- | --- | --- | --- | --- |
| Mg | −4 |  |  |  |  |  |  |  |  |
| Li | −9 | 0 |  |  |  |  |  |  |  |
| K | 12 | 20 | 11 |  |  |  |  |  |  |
| Ca | −28 | −6 | −1 | 12 |  |  |  |  |  |
| Sc | −38 | −3 | 12 | 58 | 17 |  |  |  |  |
| Ti | −23 | 16 | 34 | 94 | 43 | 8 |  |  |  |
| Sr | −27 | −26.5 | 0 | 7 | 1 | 25 | 53 |  |  |
| La  Zr | −41  −40 | −7  6 | 6  27 | 46  88 | 8  37 | 2  4 | 20  0 | 14  48 | 13 |

Supplementary Table 3 | Mixing enthalpy (KJ/mol) between two different elements. The mixing enthalpy between In and other elements is relatively negative, indicating preferable chemical compatibility.

|  | In | Mg | Li | K | Ca | Sc | Ti | Sr | La |
| --- | --- | --- | --- | --- | --- | --- | --- | --- | --- |
| Mg | −4 |  |  |  |  |  |  |  |  |
| Li | −12 | 0 |  |  |  |  |  |  |  |
| K | −4 | 20 | 11 |  |  |  |  |  |  |
| Ca | −35 | −6 | −1 | 12 |  |  |  |  |  |
| Sc | −30 | −3 | 12 | 58 | 17 |  |  |  |  |
| Ti | −5 | 16 | 34 | 94 | 43 | 8 |  |  |  |
| Sr | −37 | −26.5 | 0 | 7 | 1 | 25 | 53 |  |  |
| La  Zr | −39  −25 | −7  6 | 6  27 | 46  88 | 8  37 | 2  4 | 20  0 | 14  48 | 13 |

Supplementary Table 4 | Mixing enthalpy (KJ/mol) between two different elements. The mixing enthalpy between Sn and other elements is relatively negative, indicating preferable chemical compatibility.

|  | Sn | Mg | Li | K | Ca | Sc | Ti | Sr | La |
| --- | --- | --- | --- | --- | --- | --- | --- | --- | --- |
| Mg | −9 |  |  |  |  |  |  |  |  |
| Li | −18 | 0 |  |  |  |  |  |  |  |
| K | −7 | 20 | 11 |  |  |  |  |  |  |
| Ca | −45 | −6 | −1 | 12 |  |  |  |  |  |
| Sc | −45 | −3 | 12 | 58 | 17 |  |  |  |  |
| Ti | −21 | 16 | 34 | 94 | 43 | 8 |  |  |  |
| Sr | −46 | −26.5 | 0 | 7 | 1 | 25 | 53 |  |  |
| La  Zr | −53  −43 | −7  6 | 6  27 | 46  88 | 8  37 | 2  4 | 20  0 | 14  48 | 13 |

Supplementary Table 5 | Inductively coupled plasma-mass spectrometry spectrum of K(Fe0.2Co0.2Ni0.2Mn0.2Ga0.14In0.04Sn0.02)F3 HECs.

| Element | Theoretical Mass  (wt.%) | Experimental Mass  (wt.%) | Relative Deviation  (%) |
| --- | --- | --- | --- |
| K | 24.67 | 24.75 | +0.34 |
| Fe | 7.05 | 7.02 | –0.38 |
| Co | 7.44 | 7.48 | +0.59 |
| Ni | 7.41 | 7.38 | –0.35 |
| Mn | 6.93 | 6.98 | +0.69 |
| Ga | 6.16 | 6.12 | –0.62 |
| In | 2.90 | 2.92 | +0.76 |
| Sn | 1.50 | 1.51 | +0.80 |
| F | 35.94 | 35.84 | –0.28 |

Supplementary Table 6 | Inductively coupled plasma-mass spectrometry spectrum of (Hf0.2Ta0.2Nb0.2Mo0.2Ga0.14In0.04Sn0.02)C HECs.

| Element | Theoretical Mass  (wt.%) | Experimental Mass  (wt.%) | Relative Deviation  (%) |
| --- | --- | --- | --- |
| Hf | 25.79 | 25.82 | +0.12 |
| Ta | 26.15 | 26.10 | –0.19 |
| Nb | 13.43 | 13.46 | +0.22 |
| Mo | 13.87 | 13.84 | –0.22 |
| Ga | 7.05 | 7.08 | +0.43 |
| In | 3.32 | 3.30 | –0.60 |
| Sn | 1.72 | 1.73 | +0.58 |
| C | 8.67 | 8.67 | 0.00 |

Supplementary Table 7 | Inductively coupled plasma-mass spectrometry spectrum of (Fe0.2Co0.2Ni0.2Cr0.2Ga0.14In0.04Sn0.02)S2 HECs.

| Element | Theoretical Mass  (wt.%) | Experimental Mass  (wt.%) | Relative Deviation  (%) |
| --- | --- | --- | --- |
| Fe | 8.87 | 8.89 | +0.23 |
| Co | 9.36 | 9.33 | –0.32 |
| Ni | 9.32 | 9.35 | +0.32 |
| Cr | 8.26 | 8.28 | +0.24 |
| Ga | 7.75 | 7.72 | –0.39 |
| In | 3.65 | 3.67 | +0.55 |
| Sn | 1.89 | 1.88 | –0.53 |
| S | 50.90 | 50.88 | –0.04 |

1. * Corresponding author

   Email: zhouxiaoping@cqu.edu.cn. Tel./Fax: +86-23-6512-3511 [↑](#footnote-ref-1)
